1 **Downregulation of Dickkopf-3, a Wnt antagonist elevated in Alzheimer's disease,**  
2 **restores synapse integrity and memory in a disease mouse model**

3

4 **AUTHORS**

5 Nuria Martin-Flores<sup>1,4</sup>, Marina Podpolny<sup>1,4</sup>, Faye McLeod<sup>1</sup>, Isaac Workman<sup>1</sup>, Karen Crawford<sup>2</sup>,  
6 Dobril Ivanov<sup>2</sup>, Ganna Leonenko<sup>2</sup>, Valentina Escott-Price<sup>2,3</sup>, Patricia C. Salinas<sup>1\*</sup>

7

8 **Affiliations**

9 <sup>1</sup> Department of Cell and Developmental Biology, Division of Biosciences, University College  
10 London, UK

11 <sup>2</sup> Division of Psychological Medicine and Clinical Neurosciences, Cardiff University, UK

12 <sup>3</sup> UK Dementia Research Institute, Cardiff University, UK

13 <sup>4</sup> These authors contributed equally to this work

14 \* Corresponding author. Correspondence: Professor Patricia C. Salinas, [p.salinas@ucl.ac.uk](mailto:p.salinas@ucl.ac.uk)

15 **ABSTRACT**

16 Increasing evidence supports a role for deficient Wnt signaling in Alzheimer's disease (AD).  
17 Studies reveal that the secreted Wnt antagonist Dickkopf-3 (DKK3) colocalizes to amyloid  
18 plaques in AD patients. Here, we investigate the contribution of DKK3 to synapse integrity in  
19 healthy and AD brains. Our findings show that DKK3 expression is upregulated in the brains  
20 of AD subjects and that DKK3 protein levels increase at early stages in the disease. In hAPP-  
21 J20 and hAPP<sup>NL-G-F/NL-G-F</sup> AD models, extracellular DKK3 levels are increased and DKK3  
22 accumulates at dystrophic neuronal processes around plaques. Functionally, DKK3 triggers  
23 the loss of excitatory synapses through blockade of the Wnt/GSK3 $\beta$  signaling with a  
24 concomitant increase in inhibitory synapses signaling via activation of the Wnt/JNK pathway.  
25 In contrast, DKK3 knockdown restores synapse number and memory in hAPP-J20 mice.  
26 Collectively, our findings identify DKK3 as a novel driver of synaptic defects and memory  
27 impairment in AD.

28 **KEYWORDS**

29 Alzheimer's disease, Wnt signaling, Dickkopf, synapse, synapse degeneration, amyloid  
30 plaques, memory, hAPP-J20, hAPP<sup>NL-G-F/NL-G-F</sup>

## 31 INTRODUCTION

32 Alzheimer's disease (AD) is the most common form of dementia in the aging population. The  
33 disease is characterized by progressive synaptic dysfunction and loss, early signatures that  
34 correlate with cognitive decline in AD and precede both neuronal death and the onset of  
35 severe dementia by at least 10 years (Mucke and Selkoe, 2012; Selkoe and Hardy, 2016).  
36 Current AD models suggest that amyloid- $\beta$  ( $A\beta$ ) initiates a pathophysiological cascade leading  
37 to synapse failure and eventually cognitive decline. Although the primary neuropathological  
38 hallmarks of AD are amyloid plaques and neurofibrillary tangles, soluble  $A\beta$  oligomers ( $A\beta_o$ )  
39 are considered one of the key toxic proteins driving synapse dysfunction (Mucke and Selkoe,  
40 2012; Selkoe and Hardy, 2016; Walsh et al., 2002). However, the exact mechanisms by which  
41  $A\beta_o$  impair synapse function and cause their degeneration are not fully understood.

42 Increasing evidence suggests that Wnt signaling is compromised in AD, contributing to  
43 synapse degeneration. Wnts are secreted proteins that play a crucial role in synapse  
44 formation, synaptic plasticity, and synapse integrity (McLeod and Salinas, 2018). The  
45 canonical Wnt pathway is particularly impaired in AD. For example, levels of the secreted Wnt  
46 antagonist Dickkopf-1 (DKK1) are increased in the brain of AD patients and AD models  
47 (Caricasole et al., 2004; Purro et al., 2012; Rosi et al., 2010). DKK1 promotes synapse  
48 degeneration and its blockade protects against  $A\beta$ -induced dendritic spine and synapse loss  
49 (Marzo et al., 2016; Purro et al., 2012; Sellers et al., 2018). Supporting the role of deficient  
50 Wnt signaling in AD, three genetic variants of *LRP6*, a crucial Wnt co-receptor, are linked to  
51 late-onset AD and confer decreased Wnt signaling in cell lines (Alarcón et al., 2013; De Ferrari  
52 et al., 2007). Notably, mice carrying the *Lrp6*-Valine variant exhibit increased synapse  
53 vulnerability during aging and in AD (Jones et al., 2023). Furthermore, loss-of-function of *Lrp6*  
54 exacerbates amyloid pathology in an AD mouse model (Liu et al., 2014). In addition, Frizzled-  
55 1 (Fz1) and Fz7, Wnt receptors present at synapses, are downregulated in the hippocampus  
56 of AD subjects and AD models (Palomer et al., 2022). However, the molecular mechanisms  
57 by which deficient Wnt signaling contributes to synaptic defects in AD are poorly understood.  
58 Importantly, it remains unexplored whether amelioration of Wnt deficiency restores synaptic  
59 connectivity and memory in AD.

60 Dickkopf-3 (DKK3), a member of the secreted Wnt antagonist DKK family, could contribute to  
61 AD pathogenesis. Like other DKKs, DKK3 has two cysteine-rich domains but it also contains  
62 an elongated N-terminus with a Soggy domain (Krupnik et al., 1999; Niehrs, 2006). Although  
63 studies suggest that DKK3 antagonizes the Wnt canonical pathway (Caricasole et al., 2003;  
64 Mizobuchi et al., 2008; Zhu et al., 2014), the function of DKK3 in the adult brain is unclear.  
65 *Dkk3* knock-out mice are viable and do not exhibit morphological alterations in the brain, but

66 female mice manifest hyperlocomotion (Barrantes et al., 2006). Recent findings indicate that  
67 DKK3 is increased in plasma, and cerebrospinal fluid (CSF), and accumulates in A $\beta$  plaques  
68 in the human AD brain (Bruggink et al., 2015; Drummond et al., 2017; Xiong et al., 2019).  
69 However, the impact of DKK3 on synapses and cognitive function, which are affected by  
70 deficient Wnt signalling (Jones et al., 2023; Marzo et al., 2016), in AD remains to be studied.  
71 Studies on DKK3 in AD would shed new light on the mechanisms that contribute to synapse  
72 vulnerability in AD.

73 Here, we investigate the role of DKK3 in the integrity and function of excitatory and inhibitory  
74 synapses in healthy and AD brains. Our RNAseq analyses reveal that *DKK3* expression is  
75 increased in the brains of AD patients. Consistently, we found that DKK3 protein is increased  
76 in the human AD brain from early stages of the disease. In two AD mouse models, extracellular  
77 DKK3 is increased in the hippocampus before substantial plaque deposition. As the pathology  
78 progresses in the mouse AD brain, DKK3 accumulates in dystrophic neurites around amyloid  
79 plaques. Functionally, our confocal and electrophysiological studies demonstrate that  
80 increased levels of DKK3 trigger the loss of excitatory synapses with a concomitant increase  
81 in inhibitory synapses in the adult mouse hippocampus through different Wnt pathways.  
82 Crucially, *in vivo* downregulation of DKK3 ameliorates excitatory and inhibitory synaptic  
83 defects in the hippocampus and improves memory in an AD mouse model. Together, our  
84 findings in humans and functional studies in mice identify DKK3 as a driver of synapse  
85 pathology and cognitive impairment in AD.

## 86 **RESULTS**

### 87 **DKK3 is increased in the human AD brain**

88 A previous study found that DKK3 is present in A $\beta$  plaques in the brain of AD patients  
89 (Bruggink et al., 2015). To investigate whether DKK3 is increased in AD, we examined the  
90 expression of *DKK3* in the AD brain using RNA-seq data from the ROSMAP (De Jager et al.,  
91 2018), MSBB (Wang et al., 2018), and MayoRNAseq (Allen et al., 2016) datasets (n = 248  
92 controls, 379 AD cases). Logistic regression analyses revealed that *DKK3* was upregulated in  
93 AD cases (regression  $\beta$ -coefficient = 0.31; p-value =  $1.52 \times 10^{-3}$ ). In addition, ordinal regression  
94 analyses showed that *DKK3* was differentially expressed in relation to Braak scores, a  
95 measure of neurofibrillary tangle pathology (Braak et al., 2006) (regression  $\beta$ -coefficient =  
96 0.27; p-value =  $8.84 \times 10^{-4}$ ), but not to CERAD scores, a measure of neuritic plaque density  
97 (Mirra et al., 1991) (regression  $\beta$ -coefficient: 0.07; p-value = 0.43) (**Figure 1A**). These results  
98 indicate that the expression of *DKK3* is increased in the brain of human AD patients.

99 We next assessed DKK3 protein levels in the hippocampus of AD patients at different disease  
100 stages based on their Braak status. We evaluated healthy individuals and patients with Braak  
101 stages I-III and IV-VI (n = 16 per group, **Table S1**). Given that DKK3 is found at A $\beta$  plaques in  
102 the human AD brain (Bruggink et al., 2015; Drummond et al., 2017), we analyzed DKK3  
103 protein in the soluble and insoluble fractions. Soluble DKK3 levels were increased in Braak I-  
104 III patients when compared to control subjects (1.4-fold increase), but no changes were  
105 observed in Braak IV-VI (**Figure 1B**). In the insoluble fraction, in contrast, DKK3 protein levels  
106 were increased in Braak IV-VI (1.51-fold increase) (**Figure 1C**), which could be consistent with  
107 the presence of DKK3 in A $\beta$  plaques. To explore if DKK3 increases at early stages of AD, we  
108 assessed DKK3 abundance in brain tissue from the dorsolateral prefrontal cortex using a  
109 published proteomic study comprised of 106 controls, 182 AD cases, and 200 asymptomatic  
110 AD cases (Johnson et al., 2022). The asymptomatic cases are at an early preclinical stage of  
111 AD in which patients exhibit A $\beta$  and tau pathology but no significant cognitive impairment (Jack  
112 et al., 2018; Johnson et al., 2022). In line with our above results, DKK3 protein was elevated  
113 in AD cases. Importantly, DKK3 was increased in asymptomatic AD cases and further  
114 increased in AD cases when compared to asymptomatic AD (**Figure 1D**). Together, these  
115 results demonstrate that DKK3 mRNA and DKK3 protein levels are elevated in the brains of  
116 AD patients and increased with the progression of AD. Moreover, DKK3 protein is re-  
117 distributed from soluble to insoluble fractions with disease progression.

### 118 **DKK3 accumulates at atrophic neurites around amyloid plaques in AD mouse models**

119 We next analyzed where DKK3 protein is present in healthy and AD mouse brains. *Dkk3* is  
120 expressed in excitatory neurons in several brain areas including the hippocampus and  
121 neocortex (Barrantes et al., 2006; Meister et al., 2015; Thompson et al., 2008). To study the  
122 distribution of DKK3 protein, we used a specific DKK3 antibody, validated with brain samples  
123 from total knockout *Dkk3*<sup>-/-</sup> mice by western blot (**Figure S1A**) and confocal microscopy  
124 (**Figure S1B**). In the hippocampus, DKK3 protein was highly abundant in neurons of the CA1,  
125 CA2, and CA3 pyramidal layers but not in the dentate gyrus (DG) granule cell layer (**Figure**  
126 **S1C**), consistent with previous works studying *Dkk3* expression (Barrantes et al., 2006;  
127 Thompson et al., 2008). In addition, DKK3 protein was present at lower levels in a subset of  
128 astrocytes (GFAP-positive cells) (**Figure S1D**), but not in microglia (IBA1-positive cells)  
129 (**Figure S1E**). Thus, principal neurons, followed by astrocytes, are the main source of DKK3  
130 protein in the adult mouse hippocampus.

131 To further understand the role of DKK3 in the AD brain, we evaluated its localization within the  
132 hippocampus of two AD mouse models when A $\beta$  plaques are present. A $\beta$  plaques are complex  
133 structures closely associated with atrophic axons and dendrites of nearby neurons and with

134 glial cells (**Figure 2A**). Using confocal microscopy, we investigated the presence of DKK3 in  
135 hippocampal A $\beta$  plaques using anti-A $\beta$  (6E10) in 18-month-old J20 (Mucke et al., 2000a) and  
136 8-month-old hAPP<sup>NL-G-F/NL-G-F</sup> (NLGF) mice (Saito et al., 2014). DKK3 was present at A $\beta$   
137 plaques in both AD lines (**Figure 2B and Figure S2A**). Furthermore, DKK3 was present in  
138 both diffuse A $\beta$  plaques (6E10-positive but ThioS negative) and dense-core plaques (positive  
139 for 6E10 and ThioS) (**Figure S2B**). Importantly, 70% of dense-core A $\beta$  plaques contained  
140 DKK3 (**Figure 2C**). This localization was specific for DKK3, as other secreted proteins such  
141 as Wnt7a/b did not localize to A $\beta$  plaques (**Figure S2C**). Furthermore, DKK3 was absent from  
142 astrocytes and microglia in A $\beta$  plaques but specifically colocalized with Neurofilament-H+  
143 dystrophic neurites (**Figure 2D & Figure S2D**). In addition, DKK3 also colocalized with LAMP1  
144 in dystrophic neurites, which are visualized as axonal spheroids (**Figure 2D**). DAPI staining  
145 further revealed that the deposition of DKK3 within amyloid plaques was not in cell body  
146 inclusions (**Figure S2E**). Together, these results indicate that DKK3 is present in atrophic  
147 neurites around amyloid plaques.

#### 148 **Extracellular levels of DKK3 increase in the AD mouse brain through NMDAR activation**

149 The accumulation of DKK3 in A $\beta$  plaques in AD and our finding that DKK3 protein is elevated  
150 in the brain of AD patients (**Figure 1C&D**) led us to investigate whether DKK3 levels are  
151 altered in the mouse AD brain. Given that DKK3 is a secreted protein, we examined total and  
152 extracellular levels of DKK3 from acute hippocampal slices of wild-type (WT) and J20 mice at  
153 3-4 months before plaques appear. Although the total DKK3 levels did not differ between J20  
154 and WT mice in the brain homogenate, DKK3 levels were significantly increased (2.54-fold) in  
155 the extracellular fraction of J20 mice (**Figure 2E**). In a second AD mouse model, NLGF,  
156 extracellular DKK3 levels were also elevated by 2.43-fold in brain slices of these animals at 2-  
157 3 months (**Figure 2F**). Importantly, the ratio of extracellular to total DKK3 levels was  
158 significantly higher in J20 and NLGF when compared to their respective controls (**Figure**  
159 **2E&F**), suggesting that DKK3 secretion is enhanced in AD mouse brains.

160 Our next studies focused on understanding the mechanisms underlying the extracellular  
161 increase of DKK3 in AD mice. Mounting evidence demonstrates that A $\beta$  trigger the  
162 overactivation of *N*-methyl-D-aspartate (NMDA) receptors (NMDARs), which contributes to  
163 long-term depression (LTD) in AD models (Li et al., 2011; Mucke and Selkoe, 2012). We  
164 therefore investigated this question by using (2R)-amino-5-phosphonovaleric acid (APV) to  
165 block NMDARs. APV completely prevented the increase of DKK3 in the extracellular fraction  
166 of J20 and NLGF brain slices (**Figure 2E&F**). Given the increased levels of A $\beta$  in these two  
167 mouse models (Mucke et al., 2000a; Saito et al., 2014), we evaluated whether A $\beta$  increases  
168 DKK3 levels. We treated hippocampal neurons with A $\beta$  (A $\beta$ <sub>1-42</sub>) or the reverse A $\beta$ <sub>42-1</sub> control

169 peptide. A $\beta$  increased DKK3 protein levels by 2.50- and 2.48-fold in the cellular lysate and  
170 the extracellular fraction respectively (**Figure S2F-H**), indicating that A $\beta$  increased the overall  
171 levels of DKK3 in hippocampal neurons. Treatment of neurons with APV in the presence of  
172 A $\beta$  decreased extracellular DKK3 levels to 1.48-fold. Although this reduction did not reach  
173 statistical significance using a Kruskal-Wallis with Dunn's test ( $p = 0.0726$ ), it was statistically  
174 significant using a t-test ( $p = 0.0384$ ). These results suggest that blockade of NMDARs partially  
175 occludes the ability of A $\beta$  to increase DKK3 levels in the extracellular fraction.

176 Next, we examined whether DKK3 levels were regulated by NMDAR-mediated synaptic  
177 plasticity by performing glycine-induced chemical long-term potentiation (cLTP) or NMDA-  
178 induced chemical long-term depression (cLTD) in cultured hippocampal neurons. Induction of  
179 cLTP did not affect DKK3 protein levels in the cellular or extracellular fractions (**Figure S3A**).  
180 In contrast, cLTD significantly increased the levels of extracellular DKK3 without affecting the  
181 levels in the cellular fractions (**Figure S3B**). Similar results were obtained using brain slices  
182 after cLTD-induction (**Figure S3C**). To test if the increase in extracellular DKK3 was due to  
183 changes in vesicular trafficking of DKK3, we used brefeldin A (BFA), which interrupts vesicle  
184 trafficking and exocytosis (Brewer et al., 2022; He et al., 2015; Katsinelos et al., 2018). We  
185 found that BFA treatment significantly reduced DKK3 levels in the extracellular space under  
186 control conditions and completely prevented the increase in DKK3 levels following cLTD-  
187 induction (**Figure S3C**). The lack of a difference in DKK3 levels in the total homogenate could  
188 be explained by the fact that only a small fraction of cellular DKK3 is released into the  
189 extracellular media, as supported by our findings that DKK3 was less abundant in the  
190 extracellular fraction when compared to the total homogenate (**Figure S3D**). Together, these  
191 results strongly suggest that trafficking/secretion of DKK3 was enhanced by NMDAR-  
192 mediated cLTD-induction.

### 193 **DKK3 differentially affects excitatory and inhibitory synapses in the adult hippocampus**

194 Given that DKK1, a member of the Dkk family, leads to excitatory synapse disassembly and  
195 synaptic plasticity defects (Galli et al., 2021, 2014; Marzo et al., 2016), we evaluated the  
196 impact of increased DKK3 levels on synapses by performing *ex vivo* gain-of-function  
197 experiments using brain slices (**Figure 3A**). We focused on the CA3 region as DKK3 is highly  
198 expressed in this region (Thompson et al., 2008) (**Figure S1C**), and is required for encoding  
199 spatial and other episodic memories, processes which are impaired in AD (Deuker et al.,  
200 2014). Moreover, we previously reported that A $\beta$  trigger synapse loss in the CA3 *stratum*  
201 *radiatum* (SR) region of the hippocampus (Purro et al., 2012). Gain-of-function of DKK3  
202 reduced the puncta number of the excitatory presynaptic marker vGLUT1 (by 38.99%), the  
203 postsynaptic marker PSD-95 (by 32.58%), and the total number of excitatory synapses (by

204 60.85%), determined by the colocalization of these synaptic markers, in the CA3 SR (**Figure**  
205 **3B**). These synaptic changes were not due to neuronal death (**Figure S4A&B**). Patch-clamp  
206 recordings of CA3 neurons revealed that DKK3 gain-of-function decreased the frequency of  
207 miniature excitatory postsynaptic currents (mEPSC) by 48.54% but did not affect their  
208 amplitude (**Figure 3C**).

209 We further investigated whether DKK3 gain-of-function affects inhibitory synapses. DKK3  
210 increased the density of puncta for the inhibitory postsynaptic marker gephyrin (by 55.39%)  
211 without affecting the density of the inhibitory presynaptic marker vGAT in the CA3 SR (**Figure**  
212 **3D**). Notably, DKK3 increased the number of inhibitory synapses (by 65.99%) (**Figure 3D**)  
213 based on the colocalization of the pre and postsynaptic markers. Patch-clamp recordings of  
214 CA3 neurons uncovered that DKK3 increased the frequency of miniature inhibitory  
215 postsynaptic currents (mIPSC) by 65.56% but did not affect their amplitude (**Figure 3E**). In  
216 the CA1 SR, DKK3 induced similar effects on excitatory and inhibitory synapse density (**Figure**  
217 **S4C&D**). Together, these results demonstrate that DKK3 gain-of-function decreases  
218 excitatory synapse number but increases inhibitory synapse number in the adult  
219 hippocampus.

## 220 **DKK3 regulates excitatory synapse number through the Wnt/GSK3 $\beta$ pathway and** 221 **inhibitory synapse number through Wnt/JNK cascade**

222 We next examined the Wnt signaling pathways mediating DKK3-induced synaptic changes.  
223 Wnts can signal through different pathways, including the Wnt/GSK3 and Wnt/JNK cascades  
224 (Niehrs, 2012; Nusse and Clevers, 2017) (**Figure 4A&D**). A previous study showed that DKK1  
225 induces synapse loss by blocking the canonical Wnt pathway in the hippocampus (Marzo et  
226 al., 2016). To investigate if DKK3 triggers synaptic changes through this pathway, we  
227 evaluated the puncta density of  $\beta$ -catenin, which is degraded upon inhibition of Wnt/GSK3 $\beta$   
228 signaling (Nusse and Clevers, 2017). To exclude changes in  $\beta$ -catenin density due to synapse  
229 loss, we measured the density of extra-synaptic  $\beta$ -catenin as we had done before (Galli et al.,  
230 2014). Indeed, DKK3 decreased the number of extra-synaptic  $\beta$ -catenin puncta in  
231 hippocampal slices, which was restored when the Wnt/GSK3 $\beta$  cascade was activated using  
232 the GSK3 inhibitor 6-bromoindirubin-3'-oxime (BIO) (Marzo et al., 2016) (**Figure 4B**).  
233 Importantly, BIO increased the density of extra-synaptic  $\beta$ -catenin puncta under control  
234 conditions, confirming the activation of canonical Wnt signaling (**Figure 4B**). We next explored  
235 whether activation of canonical Wnt signaling prevented DKK3-induced synaptic changes. At  
236 the concentration and time used, BIO did not affect the number of excitatory synapses under  
237 control brain slices, but completely blocked the DKK3-induced loss of excitatory synapses  
238 (**Figure 4C**). Similar results were obtained with CHIR99021, another highly specific GSK3



239 inhibitor (Ring et al., 2003) (**Figure S5A**). Thus, DKK3 affects excitatory synapse number  
240 through the Wnt/GSK3 $\beta$  pathway.

241 Next, we investigated if DKK3 increases inhibitory synapses through canonical Wnt signaling  
242 by blocking GSK3 using BIO. In contrast to excitatory synapses, BIO did not affect DKK3's  
243 impact on inhibitory synapse density (**Figure S5B**). Therefore, DKK3 regulates inhibitory  
244 synapse density independently of the Wnt/GSK3 $\beta$  pathway. Previous studies showed that  
245 DKK1 concomitantly inhibits the Wnt/GSK3 $\beta$  pathway and activates the Wnt/Planar Cell  
246 Polarity (PCP) signaling cascade (Caneparo et al., 2007; Killick et al., 2014; Marzo et al.,  
247 2016). The PCP pathway activates c-Jun N-terminal kinase (JNK) (**Figure 4D**), which has  
248 been implicated in A $\beta$  toxicity (Killick et al., 2014). In brain slices, DKK3 increased phospho-  
249 JNK, a readout for the JNK activation (**Figure 4E**). This increase was blocked by the JNK  
250 inhibitor CC-930 (Plantevin Krenitsky et al., 2012) (**Figure 4E**), indicating that DKK3 activates  
251 the Wnt/JNK signaling pathway. We next tested the effect of CC-930 on inhibitory synapses  
252 and found that this JNK inhibitor blocked the DKK3-induced increase in the number of gephyrin  
253 puncta and inhibitory synapse density (**Figure 4F**). In contrast, JNK inhibition did not block the  
254 effect of DKK3 on excitatory synapses (**Figure S5C**). Together, our results indicate that DKK3  
255 induces the loss of excitatory synapses through inhibition of Wnt/GSK3 $\beta$  signaling but  
256 increases inhibitory synapses through activation of the Wnt/JNK pathway.

### 257 ***In vivo* DKK3 loss-of-function decreases inhibitory synapses without affecting** 258 **excitatory synapses in the healthy adult brain**

259 We next studied the *in vivo* role of DKK3 by downregulating DKK3 in adult WT mice using a  
260 viral transduction approach. DKK3 was knocked down in the CA3 region of the hippocampus  
261 using AAV9 expressing enhanced green fluorescent protein (EGFP) and scramble shRNA  
262 (Scr shRNA) or shRNA against DKK3 (DKK3 shRNA) (**Figure 5A**), and synapses were  
263 evaluated a month later. This approach led to approximately 85% knockdown of DKK3 at the  
264 injection site (**Figure 5A**). Excitatory and inhibitory synapses were assessed by confocal  
265 microscopy and by whole-cell patch-clamp recordings. In contrast to gain-of-function  
266 experiments, DKK3 silencing did not affect excitatory synapse number (**Figure 5B**) or mEPSC  
267 frequency (**Figure 5C**). However, DKK3 loss-of-function decreased the amplitude of mEPSCs  
268 (by 28.18%, **Figure 5C**). Conversely, knockdown of DKK3 reduced the number of inhibitory  
269 synapses (by 37.30%, **Figure 5D**), the frequency of mIPSCs (by 71.76%), and their amplitude  
270 (by 35.02%, **Figure 5E**). Thus, downregulation of DKK3 in WT brain reduces the number of  
271 inhibitory synapses without affecting excitatory synapses, suggesting that endogenous DKK3  
272 is required for the maintenance of inhibitory synapses but not for the integrity of excitatory  
273 synapses in the healthy adult brain.

274 ***In vivo* DKK3 loss-of-function ameliorates excitatory and inhibitory synapse changes**  
275 **in J20 mice**

276 To investigate the contribution of DKK3 to synaptic changes in AD, we knocked down DKK3  
277 in the hippocampus of J20 mice at two different disease stages using AAV9-Scr shRNA or  
278 AAV9-DKK3 shRNA (**Figure 6A & Figure S6A**). J20 mice exhibit excitatory synapse loss in  
279 the hippocampus at 4-months of age (early stage), whereas plaque deposition starts around  
280 5-months and is widely distributed in the cortex and hippocampus by 9-months (late stage)  
281 (Hong et al., 2016; Meilandt et al., 2009; Mucke et al., 2000a, 2000b). We first evaluated the  
282 impact of DKK3 knockdown on excitatory and inhibitory synapses in J20 mice at early stages.  
283 We found that 4-month-old J20 mice exhibited a 40-45% loss of excitatory synapses in the  
284 CA3 SR when compared to WT (**Figure 6B & Figure S6B**) as previously reported (Hong et  
285 al., 2016). Remarkably, DKK3 knockdown restored excitatory synapse number in J20 mice  
286 (**Figure 6B & Figure S6B**). In contrast to excitatory synapses, inhibitory synapses were  
287 increased by 20.60% in J20 mice compared to WT (**Figure 6C & Figure S6C**). Importantly,  
288 DKK3 silencing decreased inhibitory synapse number in these mice (**Figure 6C & Figure**  
289 **S6C**). Thus, *in vivo* DKK3 loss-of-function ameliorates synaptic defects in J20 mice, supporting  
290 the hypothesis that DKK3 is a key contributor to synaptic changes in this AD mouse model.

291 A key feature of AD brains is the loss of synapses around A $\beta$  plaques (Koffie et al., 2012).  
292 Therefore, we investigated whether DKK3 affects synapse number around plaques in 9-  
293 month-old J20 mice (**Figure 6A**). We observed a significant effect of distance on the density  
294 of excitatory synapses from the core of the plaque ( $F(6, 318) = 27.26$ ,  $p$ -value  $< 0.0001$ ) and  
295 inhibitory synapses ( $F(6, 276) = 23.51$ ,  $p$ -value  $< 0.0001$ ) (**Figure 6D&E**). Importantly, DKK3  
296 silencing significantly increased the number of excitatory synapses (**Figure 6D & Figure S6D**)  
297 but decreased the density of inhibitory synapses around plaques (**Figure 6E & Figure S6E**)  
298 when compared to J20 mice injected with Scr shRNA. Importantly, knockdown of DKK3 did  
299 not affect the number or size of plaques in the CA3 SR (**Figure S6F**).

300 Given the role of DKK1 in synaptic changes and in AD (Caricasole et al., 2004; Marzo et al.,  
301 2016; Purro et al., 2012), we next investigated whether modulation of DKK3 levels affected  
302 *Dkk1* mRNA levels in the hippocampus of WT and J20 mice injected with Scr or DKK3 shRNA.  
303 However, no changes in *Dkk1* mRNA levels were observed (**Figure S6G**). We next  
304 investigated whether increased *Dkk1* led to changes in *Dkk3* expression. For this, we used a  
305 transgenic mouse model that expresses *Dkk1* upon induction (*iDkk1* mice) (Galli et al., 2021,  
306 2014; Marzo et al., 2016). After 14 days of *Dkk1* expression and when synaptic changes are  
307 observed in these mice, we found that *Dkk3* levels were unaltered in the hippocampus (**Figure**  
308 **S6H**). Thus, *Dkk3*'s expression is unaffected by *Dkk1* and vice versa. Together, these results

309 demonstrate that loss-of-function of DKK3 ameliorates excitatory and inhibitory synapse  
310 changes in J20 mice independently of DKK1 before plaque burden starts (4-months-old), and  
311 later when amyloid plaque pathology is evident (9-months-old).

### 312 ***In vivo* DKK3 loss-of-function improves memory in J20 mice**

313 The finding that DKK3 loss-of-function reverses synaptic changes at early and late stages in  
314 J20 mice led us to test whether silencing DKK3 restores hippocampal-mediated learning and  
315 memory in these mice (**Figure 7A**). Knockdown of DKK3 using viral injections did not affect  
316 exploratory activity or anxiety in J20 mice (**Figure S7A&B**). In contrast, DKK3 downregulation  
317 significantly improved spatial memory in J20 mice as evaluated by the novel object location  
318 test (NOLT) (**Figure 7B**). Next, we examined long-term spatial working memory using the  
319 Morris Water Maze (MWM). No deficiencies in vision or locomotion were observed as escape  
320 latencies did not differ between groups when the platform was visible (**Figure S7C**). We then  
321 assessed reference spatial learning using the hidden platform version of the MWM (**Figure**  
322 **7C**). Performance improved significantly in all 4 groups during training, although the escape  
323 latency in J20-Scr shRNA mice remained significantly higher than that of WT-Scr shRNA mice  
324 (**Figure 7C**). Importantly, silencing DKK3 in J20 mice fully rescued this defect (**Figure 7C**). To  
325 test spatial memory, probe trials were performed on day 5 (early probe) and day 8 (late probe).  
326 In the first early probe test, J20-Scr shRNA animals traveled significantly less in the target  
327 quadrant than WT-Scr shRNA mice (**Figure 7D**). After further training, in the late probe, the  
328 time to first entrance to the target location (platform) and the distance traveled in the target  
329 quadrant were restored in the J20-DKK3 shRNA mice when compared to J20-Scr shRNA mice  
330 (**Figure 7E**). Together, these results demonstrate that DKK3 downregulation in the  
331 hippocampus restores cognitive function in J20 AD mice. In summary, our functional studies  
332 in mice together with our results obtained from human AD patients strongly support a role for  
333 DKK3 in synapse dysfunction and memory impairment in AD.

### 334 **DISCUSSION**

335 Synapse loss is the strongest correlate with cognitive impairment in AD (Mucke and Selkoe,  
336 2012; Selkoe and Hardy, 2016). However, the mechanisms that trigger synaptic changes  
337 remain poorly understood. In this work, we investigated the function of the Wnt antagonist  
338 DKK3 on synaptic integrity and memory in the healthy and AD brain. Our functional analyses  
339 in AD models and our studies in human samples strongly support the notion that DKK3  
340 contributes to synapse defects and memory impairment in AD.

341 Our analyses of brain samples from AD patients show an upregulation of DKK3 at the mRNA  
342 and protein levels. Importantly, DKK3 elevation starts from early stages as we observed  
343 increased protein levels in Braak I-III subjects and in asymptomatic cases using a published  
344 proteomic dataset (Johnson et al., 2022). These findings are in agreement with other  
345 proteomic studies showing increased levels of DKK3 in different brain areas, including the  
346 hippocampus and in cortical synaptosomes of AD patients (Hesse et al., 2019; Xu et al., 2019).  
347 Together, our findings in AD patients suggest that increased DKK3 levels in the brain could  
348 underlie synapse dysfunction in AD.

349 Amyloid plaques are a prominent neuropathological feature of AD. A previous study revealed  
350 that DKK3 is present at A $\beta$  plaques in the brains of AD subjects (Bruggink et al., 2015), which  
351 was later confirmed by proteomic studies in human and mouse brains (Drummond et al., 2017;  
352 Xiong et al., 2019). Consistent with these findings, we demonstrate that DKK3 accumulates at  
353 both diffuse and dense-core A $\beta$  plaques in two AD mouse models: the NLGF and J20 lines.  
354 Moreover, our analyses revealed that DKK3 is specifically localized at axonal spheroids. DKK3  
355 colocalized with LAMP1, suggesting that DKK3 is present in abnormally enlarged vesicles.  
356 This accumulation could indicate changes in DKK3 transport within dystrophic neurites  
357 affecting its degradation and/or secretion. We found that extracellular DKK3 levels are  
358 elevated in brain slices from J20 and NLGF models before substantial amyloid burden occurs,  
359 whereas acute exposure to A $\beta$ o increase both total and extracellular DKK3 levels in neurons.  
360 Intriguingly, a study reported reduced levels of DKK3 in the human AD brain and an AD mouse  
361 model (Zhang et al., 2017), but the specificity of the DKK3 antibody used in this study was not  
362 demonstrated. Moreover, this work indicated that overexpression of DKK3 restored memory  
363 in an AD model (Zhang et al., 2017). However, the generation of these mice was not fully  
364 characterized. Importantly, this study is in disagreement with other human proteomic studies  
365 (Hesse et al., 2019; Johnson et al., 2022; Xu et al., 2019) and our own findings that DKK3 is  
366 elevated in AD. Indeed, our studies using a validated antibody revealed that DKK3 is elevated  
367 in the brains of AD patients. In conclusion, our results are consistent with several other findings  
368 that DKK3 levels are increased in AD suggesting that elevated DKK3 may contribute to AD  
369 pathogenesis.

370 How are DKK3 levels regulated? Here we demonstrate that activity-dependent modulation of  
371 NMDARs regulates DKK3 levels. Several studies showed that A $\beta$ o block glutamate uptake by  
372 neurons, raising the extracellular glutamate levels and aberrantly activating NMDARs, leading  
373 to impaired synaptic function and memory (Li et al., 2011; Mucke and Selkoe, 2012).  
374 Furthermore, blockade of NMDARs protects synapse density and cognitive function in AD  
375 mouse models (Hu et al., 2009; Ye et al., 2004). Our studies revealed that the increased

376 extracellular DKK3 levels in the hippocampus of J20 and NLGF mice are completely abolished  
377 by blockade of NMDARs. Conversely, extracellular DKK3 levels are increased by NMDAR-  
378 induced cLTD without affecting total levels of the protein. These apparently paradoxical results  
379 could be reconciled by our finding that only a small proportion of DKK3 is released from  
380 neurons, and therefore changes in DKK3 protein levels are not detected in the total cell lysate.  
381 These findings suggest that overactivation of NMDARs may trigger DKK3 release. Consistent  
382 with this suggestion, treatment with BFA, an inhibitor of vesicle transport used to study the  
383 release of proteins (Brewer et al., 2022; He et al., 2015; Katsinelos et al., 2018), blocks the  
384 increase in extracellular levels of DKK3 after cLTD. Given that LTD is increased in AD, these  
385 results suggest a possible mechanism for the regulation of DKK3 secretion in this condition.

386 DKK3 is the most highly expressed member of the DKK family of Wnt antagonists in the human  
387 and mouse brain (Zhang et al., 2014). Here, we demonstrate a novel role for DKK3 in  
388 differentially regulating both excitatory and inhibitory synapses in the hippocampus. These  
389 results are in contrast to those obtained with DKK1, which only affects excitatory synapses in  
390 the hippocampus (Marzo et al., 2016). Indeed, gain-of-function of DKK3 decreases the number  
391 of excitatory synapses but increases inhibitory synapses in the adult hippocampus.  
392 Conversely, *in vivo* knockdown of endogenous DKK3 in adult WT mice decreases inhibitory  
393 synapses but does not affect excitatory synapse density. This finding suggests that other  
394 molecules might compensate for the loss of DKK3 resulting in the maintenance of excitatory  
395 synapse number under basal conditions in the healthy brain. However, knockdown of DKK3  
396 reduces the amplitude of mESPCs. A possible explanation for this finding is that endogenous  
397 DKK3 is required for excitatory synapse function without affecting their structural stability.

398 Our results also demonstrate that DKK3 signals through different pathways to regulate  
399 excitatory and inhibitory synapses. A key component of the canonical Wnt pathway is GSK3 $\beta$ .  
400 The activity of GSK3 $\beta$  is increased in the AD brain, which is associated with reduced Wnt  
401 signalling (Leroy et al., 2007). Importantly, activation of canonical Wnt pathway by inhibition  
402 of GSK3 blocks DKK3-mediated excitatory synapse loss, which is consistent with a role for  
403 DKK3 as an antagonist of canonical Wnt signaling (Caricasole et al., 2003; Mizobuchi et al.,  
404 2008; Zhu et al., 2014). GSK3 $\beta$  also plays a role in the production of mitochondrial ATP, a key  
405 event in maintaining synapses (Gomez-Suaga et al., 2022). However, this function is disrupted  
406 in the presence of toxic proteins such as Tau and, importantly, recovered by inhibition of  
407 GSK3 $\beta$  (Gomez-Suaga et al., 2022; Szabo et al., 2023). Thus, DKK3 could also contribute to  
408 the loss of excitatory synapses by impairing mitochondrial function through activation of  
409 GSK3 $\beta$ .

410 In contrast to excitatory synapses, blockade of GSK3 does not restore the impact of DKK3 on  
411 inhibitory synapse number. Instead, JNK blockade prevents DKK3-induced inhibitory synapse  
412 assembly, indicating a role for Wnt/JNK signaling in this process. Our finding that DKK3  
413 activates JNK in the hippocampus is consistent with previous results in other cell types  
414 (Abarzua et al., 2005; Mizobuchi et al., 2008; Yu et al., 2017). Importantly, JNK blockade did  
415 not affect the loss of excitatory synapses by DKK3. Together, our results show that DKK3  
416 regulates the stability of excitatory and inhibitory synapses in the adult hippocampus through  
417 different signaling pathways.

418 Our functional studies in the J20 mouse model of AD demonstrate that knocking down DKK3  
419 in J20 mice ameliorates the changes in excitatory and inhibitory synapse number in the  
420 hippocampus both before and after plaque deposition. Although loss of synapses around  
421 amyloid plaques is well described (Koffie et al., 2012), changes in synapse number induced  
422 by silencing DKK3 is unlikely to be due to the formation of plaques as we observed similar  
423 synaptic changes when plaques are absent. In line with this view, knockdown of DKK3 does  
424 not affect the number or size of amyloid plaques in the J20 hippocampus. Moreover, our gain-  
425 of-function studies demonstrate that DKK3 directly affects the integrity of excitatory and  
426 inhibitory synapses. Crucially, downregulation of DKK3 also improves cognitive function,  
427 particularly spatial memory, in J20 mice. The rescue of the synaptic and cognitive defects is  
428 specific to DKK3 downregulation as no differences in *Dkk1* levels, a Wnt antagonist that affects  
429 synapses (Marzo et al., 2016), are observed.

430 Our functional studies in the J20 demonstrate a novel role for DKK3 in synaptic and cognitive  
431 function. In addition, our results using human AD brain samples provide strong support for the  
432 contribution of DKK3 to AD. Thus, DKK3 is a potential target for ameliorating excitatory and  
433 inhibitory synaptic impairment and memory dysfunction in AD.

## 434 **MATERIALS AND METHODS**

### 435 **Human tissue**

436 Anonymized human samples from control and AD patients were obtained from Cambridge  
437 Brain Bank (CBB), Division of the Human Research Tissue Bank, Addenbrooke's Hospital,  
438 Cambridge, UK. All samples were obtained with informed consent under CBB license (NRES  
439 10/HO308/56) approved by the NHS Research Ethics Services. Tissues were stored at -80°C.  
440 Demographic data and Braak stages for each subject are shown in **Table S1**.

### 441 **Mice**

442 All procedures involving animals were conducted according to the Animals Scientific  
443 Procedures Act UK (1986) and in compliance with the ethical standards at University College  
444 London (UCL). WT C57BL/6J were obtained from Jackson Laboratories. J20 mice were  
445 obtained from Jackson Laboratories and maintained on a C57BL/6J genetic background. J20  
446 hemizygous transgenic males were bred with WT C57BL/6J females to generate hemizygous  
447 transgenic mice (J20) and WT littermates. Genotyping was performed using DNA from ear  
448 biopsies and with the following primers to detect the human APP transgene: forward 5'-  
449 GGTGAGTTTGTAAAGTGATGCC-3' and reverse 5'- TCTTCTTCTTCCACCTCAGC -3'. APP<sup>NL-  
450 G-F/NL-G-F</sup> mice were obtained from Saito et al. (Saito et al., 2014) and maintained in C57BL/6J  
451 background as previously described (Palomer et al., 2022). Double transgenic mice (*iDkk1*)  
452 were obtained by crossing tetO-Dkk1 transgenic mice with CaMKII $\alpha$ rtTA2 transgenic mice  
453 (both C57BL/6J background) as previously described (Galli et al., 2014; Marzo et al., 2016).  
454 Adult control (tetO-Dkk1, CaMKII $\alpha$ -rtTA2 or wild-type littermates) and *iDkk1* mice were fed  
455 with food pellets containing 6mg/kg doxycycline for 14 days. Animals were housed in  
456 ventilated cages with access to food and water ad libitum and kept at 22±2°C and 55±10%  
457 humidity with a 12h/12h light cycle. Experimental animals included males and females. The  
458 ages of mice are specified in each figure legend, according to the experimental approach  
459 used.

### 460 **Primary hippocampal cultures treatments**

461 Primary hippocampal neurons (700 cells/mm<sup>2</sup>) were isolated from embryonic day 18 Sprague-  
462 Dawley rat embryos and cultured on poly-L-lysine coated plates or glass coverslips in  
463 Neurobasal medium containing N2 and B27 supplements (Invitrogen). Neurons were  
464 maintained in a 5% CO<sub>2</sub> humidified atmosphere at 37°C. One-third of the media was  
465 replenished every seven days. All experiments were performed at 20-21 days-in-vitro (DIV).

## 466 ***A $\beta$ oligomers (A $\beta$ ) preparation***

467 Synthetic A $\beta$  (A $\beta$ <sub>1-42</sub>) or reverse A $\beta$  (A $\beta$ <sub>42-1</sub>) peptides were prepared as previously described  
468 (Purro et al., 2012) with minor modifications. Briefly, HFIP films of A $\beta$ <sub>42-1</sub> (Bachem, Cat#  
469 4107743) and A $\beta$ <sub>1-42</sub> (Bachem, Cat# 4090148) were dissolved in DMSO to a concentration of  
470 5 mM. The solution was then sonicated at 40Hz for 10 minutes followed by vortexing for 30  
471 seconds. Sterile PBS was added to achieve a final A $\beta$ <sub>1-42</sub> or A $\beta$ <sub>42-1</sub> concentration of 100  $\mu$ M,  
472 and vortexed again for 20 seconds. The peptides were left to oligomerize for 24 hours at 4°C.  
473 Oligomeric preparations were centrifuged for 10 minutes at 14,000g and the solution was  
474 collected. Aggregation into oligomers was evaluated by native PAGE. 30 $\mu$ l of A $\beta$  preparations  
475 were loaded into a 16% polyacrylamide gel and transferred onto a nitrocellulose membrane.  
476 Membranes were boiled for 5 minutes in TBS, blocked with 10% non-fat milk for 60 minutes  
477 at room temperature, and incubated with anti-A $\beta$  antibody (6E10) O/N at 4°C. 19-21DIV  
478 dissociated hippocampal neurons were treated with 200 nM A $\beta$ <sub>1-42</sub> (monomers, dimers,  
479 trimers, and tetramers) or reverse A $\beta$ <sub>42-1</sub> control for 3 hours at 37 °C in combination with APV  
480 (20  $\mu$ M) or vehicle (PBS). Neurons were pre-treated with APV or vehicle 30 minutes prior to  
481 co-treatment with A $\beta$  and APV.

## 482 ***Chemical LTP and chemical LTD***

483 Hippocampal neurons were subjected to cLTP or cLTD induction at 21DIV using glycine  
484 (McLeod et al., 2018) or NMDA (Kamal et al., 1999) respectively. Briefly, 200  $\mu$ M glycine  
485 (Fisher Chemical) or 20  $\mu$ M NMDA (Tocris Bioscience), or the vehicle PBS, were applied to  
486 cultures for 10 or 5 minutes respectively. The media was then replaced with fresh medium.  
487 Lysates from neurons and extracellular media were processed for Western Blot analyses after  
488 15 minutes of exposure to DMSO, NMDA or glycine. Levels of phospho-GluA1 Ser845 and  
489 total GluA1 were evaluated as readouts.

## 490 ***Hippocampal stereotactic surgery***

491 Stereotactic injection of AAV9-EGFP-U6-Scramble shRNA or AAV9-EGFP-U6-DKK3 shRNA  
492 (both from VectorLabs) was performed bilaterally in the CA3 area of the hippocampus. The  
493 sequence for Scr shRNA and DKK3 shRNA were as follows: Scr shRNA, 5'-  
494 CCTAAGGTTAAGTCGCCCTCGCTCGAGCGAGGGCGACTTAACCTTAGGTTTTT-3' and  
495 DKK3 shRNA, 5'-  
496 GAGCCATGAATGTATCATTGACTCGAGTCAATGATACATTCATGGCTCTTTTT-3'. Adult  
497 mice were deeply anesthetized using a mixture of oxygen and isoflurane (4% for induction and  
498 2-1% for maintaining anaesthesia). Using a stereotactic frame, two injections were performed



499 in the hippocampus at the following coordinates relative to bregma [anteroposterior (AP) and  
500 mediolateral (ML) and to dural surface (dorsoventral (DV): (1) -1.7AP,  $\pm$ 2 ML, -1.85 DV; (2) -  
501 2.3 AP,  $\pm$ 2.8 ML, -2.2 DV. Viral particles were injected into the brain using a 10 $\mu$ l Hamilton  
502 microliter syringe at an infusion rate of 100nl/min. The needle was left for 5 additional minutes  
503 to ensure diffusion of the virus, then slowly retracted from the brain. After 4 weeks, synapses,  
504 behavior or gene expression were evaluated.

### 505 **Treatment of acute hippocampal slices**

506 WT and J20 mouse brains were rapidly dissected and placed in 5% CO<sub>2</sub>/95% O<sub>2</sub> ice-cold  
507 aCSF containing (in mM): 87 NaCl, 2.5 KCL, 25 NaHCO<sub>3</sub>, 1.25 Na<sub>2</sub>HPO<sub>4</sub>, 0.5 CaCl<sub>2</sub>, 7 MgCl<sub>2</sub>,  
508 10 D-(+)-Glucose, 75 sucrose (pH = 7.4). Sagittal 300  $\mu$ m slices were obtained with a  
509 vibratome and transferred to 5% CO<sub>2</sub>/95% O<sub>2</sub> aCSF (34°C) containing (in mM): 125 NaCl, 2.5  
510 KCL, 25 NaHCO<sub>3</sub>, 1.25 Na<sub>2</sub>HPO<sub>4</sub>, 1 CaCl<sub>2</sub>, 2 MgCl<sub>2</sub>, 25 D-(+)-Glucose (pH = 7.4). Brain slices  
511 were maintained in warm aCSF solution for 60 min before starting treatments.

512 Brain slices were treated with 150 ng/ml recombinant DKK3 (R&D systems) or vehicle control  
513 (PBS) for 4h (for synapse density evaluation) or 60 minutes (for phospho-JNK levels) or 200  
514 ng/ml for 3h (for electrophysiological recordings). Drugs used include 0.5  $\mu$ M BIO  
515 (Calbiochem) or vehicle (DMSO); 60 nM CC-930 (Cayman Chemical) or vehicle (DMSO); 1 $\mu$ M  
516 CHIR99021 (Calbiochem) or vehicle (DMSO); 20  $\mu$ M NMDA (Tocris Bioscience) or vehicle  
517 (PBS); 50  $\mu$ M APV (Tocris Bioscience) or vehicle (PBS); 10  $\mu$ g/ml Brefeldin A (Biolegend) or  
518 vehicle (DMSO).

### 519 **Electrophysiology**

520 Transverse hippocampal slices (300 $\mu$ m) were cut on a vibratome in ice-cold aCSF bubbled  
521 with 95% O<sub>2</sub> /5% CO<sub>2</sub> containing (in mM): 125 NaCl, 2.4 KCl, 26 NaHCO<sub>3</sub>, 1.4 NaH<sub>2</sub>PO<sub>4</sub>, 20  
522 D-(+)-Glucose, 0.5 CaCl<sub>2</sub> and 3 MgCl<sub>2</sub> as previously described (Redlingshöfer et al., 2020).  
523 CA3 pyramidal neurons were patched in whole-cell voltage-clamp configuration using pipettes  
524 (resistance 5–8 M $\Omega$ ) pulled from borosilicate glass and filled with caesium gluconate  
525 intracellular solution containing (in mM): 130 D-gluconic acid lactone, 10 HEPES, 10 EGTA, 10  
526 NaCl, 0.5 CaCl<sub>2</sub>, 1 MgCl<sub>2</sub>, 1 ATP and 0.5 GTP, 5 QX314 (pH to 7.2 with CsOH). Slices were  
527 perfused with the same aCSF solution as before except substituted with 1mM MgCl<sub>2</sub> and 2mM  
528 CaCl<sub>2</sub>. All miniature currents were recorded in the presence of 100nM TTX (Abcam). mEPSCs  
529 were held at -60 mV with 10  $\mu$ M bicuculline (Tocris Bioscience) and 50  $\mu$ M APV (Tocris  
530 Bioscience) added, whereas mIPSCs were held at 0 mV in the presence of 50  $\mu$ M APV (Ciani  
531 et al., 2011). Currents were recorded using an Axopatch 200B amplifier and low pass filtered

532 at 1 kHz and digitized (10 kHz). Analyses were performed using a combination of WinEDR  
533 and WinWCP (available free online at  
534 [http://spider.science.strath.ac.uk/sipbs/software\\_ses.htm](http://spider.science.strath.ac.uk/sipbs/software_ses.htm)) software. For event detection, the  
535 “template” function in WinEDR software was used (Clements and Bekkers, 1997). Several  
536 filters were applied to exclude events that were unlikely to be genuine.

### 537 **Tissue processing for immunofluorescence microscopy**

538 Acute slices (300  $\mu$ m) were fixed in 4% paraformaldehyde (PFA)/4% sucrose for 20 minutes.  
539 Brains used for obtaining cryosection slices were fixed overnight in 4% PFA followed by  
540 cryopreservation in 30% sucrose before freezing. Free-floating sagittal hippocampal sections  
541 (30  $\mu$ m) were obtained using a Leica cryostat.

542 Immunofluorescence staining of brain slices was performed as previously described (Marzo  
543 et al., 2016; McLeod et al., 2018). Briefly, slices were permeabilized and blocked using 10%  
544 donkey serum and 0.3% (for cryosections) or 0.5% (for acute slices) Triton X-100 in PBS for  
545 3-5 hours at room temperature. Slices were then incubated with primary antibody overnight at  
546 4°C, followed by secondary antibody incubation (Alexa Fluor, 1:600, Invitrogen) for 2 hours at  
547 room temperature and DAPI (1:50,000, Invitrogen) staining for 10 min to counterstain nuclei.  
548 Thioflavin S (ThioS, Invitrogen) staining was performed as previously described (Ly et al.,  
549 2011). Briefly, after incubation with secondary antibodies (1:500-1:600, Alexa Fluor, Thermo  
550 Fisher Scientific or Jackson ImmunoResearch Labs), brain slices were dehydrated and  
551 incubated with 1% ThioS for 15 min. Slices were then rehydrated and washed in water. Brain  
552 slices were mounted with Fluoromount-G (Southern Biotech). TUNEL (Abcam) assay was  
553 performed following manufacturer’s instructions.

554 Primary antibodies and dilutions used for immunofluorescence were: mouse Anti- A $\beta$  (6E10  
555 clone, 1:1,000, Biolegend, Cat# 803001, RRID:AB\_2564653), Rabbit Anti-A $\beta$  (6E10 clone,  
556 chimeric, 1:1,000, Novus Biologicals, Cat# NBP2-62566, RRID:AB\_2917960), chicken anti-  
557 Bassoon (1:1,000, Synaptic Systems, Cat# 141 016, RRID:AB\_2661779), Goat anti- Mouse  
558 DKK-3 (1:1,000, R and D Systems, Cat# AF948, RRID:AB\_355734), Rabbit anti-Gephyrin  
559 (1:500, Synaptic Systems, Cat# 147 002, RRID:AB\_2619838), Chicken anti-Glial Fibrillary  
560 Acidic Protein (GFAP) (1:500, Millipore, Cat# AB5541, RRID:AB\_177521), Rabbit anti-  
561 Homer1 (1:1,000, Synaptic Systems, Cat# 160 003, RRID:AB\_887730), chicken Anti-GFP  
562 (1:500, Millipore, Cat# 06-896, RRID:AB\_310288), rabbit anti-Iba1 (1:1,000, FUJIFILM Wako  
563 Shibayagi, Cat# 019-1974,1 RRID:AB\_839504), rat anti-LAMP1 (1:250, DSHB, 1D4B,  
564 RRID:AB\_528127), rabbit Anti-NeuN (D3S3I) (1:1,000, Cell Signaling Technology, Cat#  
565 12943, RRID:AB\_2630395), rabbit Anti-Neurofilament Heavy (1:5,000, Abcam, Cat# ab8135,

566 RRID:AB\_306298), mouse Anti-PSD-95 (7E3-1B8) (1:500, Thermo Fisher Scientific, Cat#  
567 MA1-046, RRID:AB\_2092361), guinea pig anti-vesicular GABA Transporter (vGAT) (1:500,  
568 Synaptic Systems, Cat# 131 004, RRID:AB\_887873), guinea pig Anti-Vesicular Glutamate  
569 Transporter 1 (vGLUT1) (1:2,000, Millipore, Cat# AB5905, RRID:AB\_2301751), goat anti-  
570 Wnt7a/b (1:1,000, R&D Systems, Cat# AF3460, RRID:AB\_2304437), mouse Anti- beta  
571 Catenin (1:1,000, BD Biosciences, Cat# 610153, RRID:AB\_397554).

## 572 **Image acquisition and analyses**

573 Confocal images were acquired using a Leica SP8 microscope and analyzed using ImageJ-  
574 FIJI (NIH) or Volocity 3D Image Analysis version 6.5.1 (Quorum Technologies). For analyses  
575 of synaptic puncta, 3 images from at least 3 brain sections per animal or 8-12 images from 2-  
576 3 separate coverslips per culture were acquired using a 63X (1.40 Numerical Aperture (NA))  
577 oil objective. Each image comprised 8 equidistant planes (0.3  $\mu\text{m}$  apart) of 76nm x 76nm. To  
578 analyze synapse density around a plaque, the plaque core was identified (core) and synapse  
579 number per 200  $\mu\text{m}^3$  was quantified at each distance from the plaque core. The number of  
580 pre- and post-synaptic puncta and number of synapses assessed as colocalization of pre- and  
581 post-synaptic markers was quantified using Volocity imaging software as previously described  
582 (Galli et al., 2014; Marzo et al., 2016; McLeod et al., 2017). Each independent value was  
583 obtained from the average of each brain section (unless otherwise stated) and the data were  
584 presented as relative values to the control and depicted as a percentage. For evaluating DKK3  
585 in 6E10 plaques of J20 and NLGF mice, images from the whole hippocampus were obtained  
586 with a tile scan using a 20X (0.75 NA) objective. Each stack comprised 30 equidistant planes  
587 1  $\mu\text{m}$  apart. Plaque quantification was performed using ImageJ-FIJI as previously described  
588 (Jones et al., 2023). Images from the CA3 SR were thresholded, and the particle analysis tool  
589 was used to obtain the number and size of plaques and the percent coverage area of A $\beta$ . For  
590 assessing DKK3 localization in ThioS positive plaques in the J20 brain, hippocampal images  
591 from at least 3 brain sections per animal were acquired using a 20X (0.75 NA) objective. Each  
592 image comprised 21 equidistant planes 50 nm apart. Presence of DKK3 in plaques was  
593 evaluated manually, and the average of the different brain slices per mouse was obtained.  
594 Data were displayed as values relative to the control condition and depicted as a percentage.  
595 For evaluating the colocalization of DKK3 with different components of A $\beta$  plaques, at least 3  
596 plaques from 3-4 brain sections per animal were obtained using a 63X (1.40 NA) oil objective.  
597 Each image comprised 8 equidistant planes (0.3  $\mu\text{m}$  apart). Colocalization analyses of DKK3  
598 and other markers (MAP2, Neurofilament H, IBA1, or GFAP) were performed in Volocity  
599 software using Pearson's coefficient tool based on intensity threshold values (the same  
600 threshold was used for all images). To assess DKK3 intensity in the CA3 area, 3 images from

601 3 brain slices per animal were taken using a 20X (14 equidistant planes 2.41  $\mu\text{m}$  apart) or a  
602 40X (8 equidistant planes 0.3  $\mu\text{m}$  apart) oil objective. For each image, DKK3 intensity was  
603 normalized to MAP2 intensity using Volocity. The number of animals or independent cultures  
604 are indicated in the figure legends.

#### 605 **Protein extraction and Western blot**

606 Proteins were extracted from WT and J20 hippocampi, primary hippocampal neurons, or  
607 human hippocampus with RIPA buffer (10mM Tris, 100mM NaCl, 1mM EDTA, 1% Nonidet P-  
608 40, 0.1% SDS, 0.5% deoxycholate, pH = 8). Samples were then sonicated and centrifuged at  
609 14,000g for 10 minutes at 4°C. The supernatant representing the soluble protein fraction was  
610 collected. For human brain samples, the pellet was washed in RIPA buffer and solubilized in  
611 4% SDS. Thereafter, samples were sonicated and centrifuged at 14,000g for 10 minutes at  
612 4°C to obtain the SDS-soluble fraction (insoluble protein fraction).

613 To evaluate the extracellular fraction of cultured neurons or brain slices, cell media from  
614 primary neurons and aCSF from acute slices treatments were collected and centrifuged at  
615 14,000g for 10 minutes at 4°C to evaluate extracellular levels of DKK3.

616 Protein concentration for all samples was quantified using a BCA kit (Thermo Fisher Scientific)  
617 according to the manufacturer's protocol. Protein extracts were resolved on 10% SDS-PAGE  
618 gels. Membranes (PVDF) were blocked with 5% non-fat milk and incubated with primary  
619 antibodies overnight at 4°C, followed by incubation of secondary antibodies for 60 min at room  
620 temperature. Chemiluminescent images were acquired using ChemiDoc and fluorescent  
621 images (total JNK) were obtained using LiCor Odyssey Clx. All images were quantified by  
622 densitometric analysis using ImageJ.

623 Primary antibodies and dilutions used for western blot were: Mouse Anti- A $\beta$  (6E10 clone,  
624 1:1,000, Biolegend, Cat# 803001, RRID:AB\_2564653), goat anti- Mouse DKK-3 (1:1,000,  
625 R&D Systems, Cat# AF948, RRID:AB\_355734), goat anti- Human DKK-3 (1:1,000, R&D  
626 Systems, Cat# AF1118, RRID:AB\_354610), rabbit anti-GAPDH (1:5,000, Abcam, Cat#  
627 ab181602, RRID:AB\_2630358), rabbit anti-GluA1 (1:1,000, Cell Signaling Technology, Cat#  
628 13185, RRID: AB\_2732897), rabbit anti-phospho GluA1 Serine 845 (1:1,000, Cell Signaling  
629 Technology, Cat# 8084, RRID: AB\_10860773), rabbit anti- SAPK/JNK (1:1,000, Cell Signaling  
630 Technology, Cat# 9252, RRID:AB\_2250373), mouse anti-Phospho-SAPK/JNK  
631 (Thr183/Tyr185) (1:500, Cell Signaling Technology, Cat# 9255, RRID:AB\_2307321), mouse  
632 anti-Tubulin (1:5,000, Sigma-Aldrich, Cat# T9026, RRID:AB\_477593), mouse Anti-Vinculin

633 (1:2,000, Sigma Aldrich, Cat# v4505, RRID: AB\_477617), HRP mouse anti-beta Actin  
634 (1:10,000, Abcam, Cat# ab8224, RRID:AB\_449644).

635 Secondary antibodies and the dilutions used for western blot were: Donkey anti-goat IgG-HRP  
636 (1:2,000, Santa Cruz Biotechnology, Cat# sc-2020, RRID:AB\_631728), donkey anti-goat IgG-  
637 HRP (1:10,000, R&D Systems, Cat# HAF109, RRID:AB\_357236), Sheep anti-Mouse IgG-  
638 HRP (1:3,000, GE Healthcare, Cat# NXA931, RRID:AB\_772209), donkey anti-Rabbit IgG-  
639 HRP (1:2,000, GE Healthcare, Cat# NA934, RRID:AB\_772206), goat anti-Rabbit IgG  
640 IRDeye® 800CW (1:10,000, Abcam, Cat# ab216773, RRID:AB\_2925189).

#### 641 **Western blot analyses**

642 Chemiluminescent and fluorescent images from western blot membranes were acquired using  
643 ChemiDoc (BioRad) or Odyssey Clx (LiCor) respectively. DKK3 chemiluminescent signals from  
644 total homogenates or cell lysates were obtained within seconds (0.5-15 seconds), whereas  
645 extracellular signals were obtained within minutes (1-5 minutes). Blots were quantified by  
646 densitometric analyses using ImageJ. Densitometric target signals were normalized to the  
647 loading control signal (except for extracellular levels) and depicted as relative levels. The ratio  
648 of extracellular/lysate DKK3 was obtained by dividing the normalized values of DKK3 in the  
649 extracellular fraction by the values of the lysate for each condition. For quantification of P-JNK,  
650 densitometric quantification of P-JNK was corrected for the densitometric signal of total JNK.

#### 651 **RNA extraction, reverse transcription and quantitative PCR (qPCR) analyses**

652 RNA was extracted from the hippocampus of WT, J20, and *iDkk1* mice using TRIzol (Thermo  
653 Fisher Scientific) and the DirectZol RNA MiniPrep Kit (Zymo Research), following the  
654 manufacturer's instructions and as previously described (Palomer et al., 2022).  
655 Retrotranscription to first-strand cDNA was performed using the RevertAid H Minus First  
656 Strand cDNA Synthesis kit (Thermo Fisher Scientific) as per manufacturer's instructions. 5-30  
657 ng of the original RNA was used to perform qPCR for *Dkk3* and *Dkk1* using GoTaq qPCR  
658 Master Mix (Promega) in a CFX96 Bio-rad system following the manufacturer's protocol (2  
659 min at 95°C followed by 40 cycles of denaturing at 95°C and annealing/extension at 60°C).  
660 *GusB*, *Pgk1*, and *Rpl13a* were used as housekeeping genes. All primers were purchased from  
661 Sigma-Aldrich and used at a final concentration of 0.5 µM. The following primers were used:  
662 *Dkk1* (forward: 5'-CCGGGAAGTACTGCAAAAAT-3'; reverse: 5'-  
663 AAAATGGCTGTGGTCAGAGG-3'), *Dkk3* (forward: 5'- GACCAGGGTGGGAAATAACA-3';  
664 reverse: 5'-GACCACCTGTCCACTCTGGT-3'), *GusB* (forward: 5'-  
665 GGTTCGAGCAGCAATGGTA-3'; reverse: 5'-GCTGCTTCTTGGGTGATGTC-3'), *Pgk1*

666 (forward: 5'-TACCTGCTGGCTGGATGG-3'; reverse: 5'-CACAGCCTCGGCATATTTCT-3'),  
667 *Rpl13a* (forward: 5'-GACTCCTGGTGTGAACCCA-3'; reverse: 5'-  
668 CTCTACCCACAGGAGCAGT-3').

669 Relative expressions of *Dkk1* and *Dkk3* mRNAs were calculated using the comparative  
670 threshold cycle (Ct) method. Samples were run in triplicate and the average Ct values were  
671 obtained using the CFX Manager software version 3.1 (BioRad). Gene expression was  
672 normalized to the expression of housekeeping genes.

### 673 **Behavioral tests**

674 Two separate cohorts of 4-month-old WT and J20 mice injected with Scr or DKK3 shRNA  
675 were used to perform behavioral tests. All tests were carried out in a dimly lit room without  
676 noise interference. Animals were tracked using the automated SMART video tracking software  
677 (Panlab).

### 678 ***Elevated plus maze***

679 Anxiety was tested using an elevated plus maze consisting of four arms (30.5x5cm each arm),  
680 two of which were surrounded by walls (enclosed arms). The apparatus was elevated 40 cm  
681 above the ground. Each mouse was placed in the central square (neutral area) facing an open  
682 arm, and time spent in the open and enclosed arms was measured for 5 min.

### 683 ***Open-field and Novel Object Location Test***

684 Hippocampal-dependent spatial and recognition memory was tested using the Novel Object  
685 Location (NOL) test. The apparatus consisted of a square arena (45x45 cm), with cues in one  
686 of the walls. Mice were allowed to freely explore for 30 min to habituate them to the arena.  
687 Distance traveled and time spent in the center and the periphery were measured. On the  
688 second day, two identical objects were placed equidistantly from walls, and mice were allowed  
689 to explore for 10 min (NOL Acquisition). Twenty-four hours later, one of the objects was moved  
690 to a novel position, and mice were allowed to explore for 5 min (NOL Testing). Object  
691 preference was measured as the percentage of time exploring the novel object location.

### 692 ***Morris Water Maze***

693 Hippocampal-dependent spatial learning and memory were assessed using the Morris Water  
694 Maze (MWM) task as previously described (Marzo et al., 2016). In the first phase, mice  
695 performed four trials with a visible platform to check for deficiencies in vision or locomotion.  
696 The escape platform was made visible by using a high-contrast top surface and attaching a

697 striped flag. In the second phase, mice were trained to find a hidden platform with extra-maze  
698 visible cues for 6 days with 4 trials per day. The platform was submerged 2 cm below water  
699 and placed at the midpoint of one of the quadrants. Each mouse was allowed to search for  
700 the platform for up to 60 sec, after which mice that failed to reach the platform were placed on  
701 the platform. All mice were left on the platform for 10 sec before they were returned to their  
702 home cage. Probe trials were conducted before the fifth day of training (early probe) and 24h  
703 after the last day of training (late probe). During the probe trials, the platform was removed  
704 from the pool, and mice were allowed to swim for 60 sec.

## 705 **Human RNAseq analyses**

706 The reprocessed ROSMAP (De Jager et al., 2018), MSBB (Wang et al., 2018) and  
707 MayoRNAseq (Allen et al., 2016) temporal cortex RNASeq datasets and their associated  
708 phenotypic data such as Braak (Braak et al., 2006) and CERAD (Mirra et al., 1991) scores  
709 were downloaded from the AMP-AD consortium  
710 (<https://www.synapse.org/#!Synapse:syn2580853/wiki/409840>). For the ROSMAP study, AD  
711 cases were defined as individuals with a cognitive diagnosis of AD with no other cause of  
712 cognitive impairment (cogdx = 4 and cogdx = 5), and controls were defined as those with no  
713 cognitive impairment (cogdx = 1). For the MSBB dataset, controls were defined as those with  
714 a CERAD score of 1 (normal) and a clinical dementia rating (CDR) of 0 or 0.5 (no cognitive  
715 deficits or questionable dementia respectively), whereas cases were defined as subjects with  
716 CERAD score of 2, 3 or 4 (possible, probable, definite AD) and a CDR of 2 or greater (mild  
717 dementia, moderate dementia, or severe to terminal dementia). For the MayoRNASeq  
718 dataset, individuals were already classified as an AD case or control based on  
719 neuropathology. All cases had a Braak stage of IV or greater. Controls had a Braak stage of  
720 III or lower.

721 RNASeq datasets from ROSMAP (De Jager et al., 2018), MSBB (Wang et al., 2018), and  
722 MayoRNAseq (Allen et al., 2016) underwent quality control using RNASEQC (DeLuca et al.,  
723 2012) and were normalized for gene length and GC content with low expressed genes filtered  
724 out. Following quality control and normalization, 16,485 genes remained in the analysis. Linear  
725 mixed effect models (LMEM) in combination with principal component (PC) analyses were  
726 performed on normalized counts to combine data and adjust for batch effects and hidden  
727 confounders. LMEM used sex, age at death, and the first three principal components as fixed  
728 effects, whilst individual ID and sequencing batch were used as random effects. Logistic  
729 regression was then performed on residuals from the LMEM for AD case/control status (n =  
730 379 AD cases, 248 controls). Ordinal regressions were also performed on residuals from the

731 LMEM for Braak stage (0-6) (n = 627) and CERAD scores (1-4) (n = 537). The  $\beta$ -coefficient  
732 indicates the degree of differential *DKK3* expression.

### 733 **Statistical analyses**

734 All graphed data are displayed as mean  $\pm$  SEM. Statistical analyses were performed using  
735 GraphPad Prism version 8.0.2. Statistical outliers were determined using Grubbs and ROUT  
736 tests. Dataset normality was tested by the D'Agostino and Pearson or Shapiro-Wilk tests.  
737 When datasets passed normality, comparisons between two groups were analyzed using the  
738 unpaired two-sided Student's T-test whilst comparisons between more than two groups used  
739 one- or two- way ANOVA, followed by Tukey's multiple comparisons tests. For non-normally  
740 distributed data, comparisons between two groups were performed using the Mann-Whitney  
741 U test, and comparisons between more than two groups with Kruskal-Wallis followed by  
742 Dunn's multiple comparison test. Pearson correlation coefficient was used for colocalization  
743 analyses. In all graphs, N-numbers corresponding to the number of independent primary  
744 cultures, animals, or human subjects, unless otherwise specified, are shown. In all figures, p-  
745 values are depicted as: \* $p$ -value $\leq$ 0.05, \*\* $p$ -value $\leq$ 0.01, \*\*\* $p$ -value $\leq$ 0.001.

### 746 **ACKNOWLEDGMENTS**

747 We would like to thank Professors Takashi Saito and Takaomi Saido for the APP<sup>NL-G-F</sup> mice  
748 and Professors Qingbo Xu for providing us with brain samples of the *DKK3*<sup>-/-</sup> *ApoE*<sup>-/-</sup> mice used  
749 as controls for antibody validation. We thank members of the Salinas lab and our collaborators  
750 Professors Francesca Cacucci and Alasdair Gibb for their support and discussion on this  
751 project. We also thank Dr Ernest Palomer for his technical advice on qPCR analyses. The  
752 results published here are in whole or in part based on data obtained from the AD Knowledge  
753 Portal (<https://adknowledgeportal.org>). ROSMAP data were provided by the Rush Alzheimer's  
754 Disease Center, Rush University Medical Center, Chicago. Data collection was supported  
755 through funding by NIA grants P30AG10161 (ROS), R01AG15819 (ROSMAP; genomics and  
756 RNAseq), R01AG17917 (MAP), R01AG30146, R01AG36042 (5hC methylation, ATACseq),  
757 RC2AG036547 (H3K9Ac), R01AG36836 (RNAseq), R01AG48015 (monocyte RNAseq)  
758 RF1AG57473 (single nucleus RNAseq), U01AG32984 (genomic and whole exome  
759 sequencing), U01AG46152 (ROSMAP AMP-AD, targeted proteomics), U01AG46161(TMT  
760 proteomics), U01AG61356 (whole genome sequencing, targeted proteomics, ROSMAP AMP-  
761 AD), the Illinois Department of Public Health (ROSMAP), and the Translational Genomics  
762 Research Institute (genomic). Additional phenotypic data can be requested at  
763 [www.radc.rush.edu](http://www.radc.rush.edu). MSBB data were generated from postmortem brain tissue collected  
764 through the Mount Sinai VA Medical Center Brain Bank and were provided by Dr. Eric Schadt



765 from Mount Sinai School of Medicine. The Mayo RNAseq study data was led by Dr. Nilüfer  
766 Ertekin-Taner, Mayo Clinic, Jacksonville, FL as part of the multi-PI U01 AG046139 (MPs  
767 Golde, Ertekin-Taner, Younkin, Price). Samples were provided from the following sources:  
768 The Mayo Clinic Brain Bank. Data collection was supported through funding by NIA grants  
769 P50 AG016574, R01 AG032990, U01 AG046139, R01 AG018023, U01 AG006576, U01  
770 AG006786, R01 AG025711, R01 AG017216, R01 AG003949, NINDS grant R01 NS080820,  
771 CurePSP Foundation, and support from Mayo Foundation. Study data includes samples  
772 collected through the Sun Health Research Institute Brain and Body Donation Program of Sun  
773 City, Arizona. The Brain and Body Donation Program is supported by the National Institute of  
774 Neurological Disorders and Stroke (U24 NS072026 National Brain and Tissue Resource for  
775 Parkinsons Disease and Related Disorders), the National Institute on Aging (P30 AG19610  
776 Arizona Alzheimers Disease Core Center), the Arizona Department of Health Services  
777 (contract 211002, Arizona Alzheimers Research Center), the Arizona Biomedical Research  
778 Commission (contracts 4001, 0011, 05-901 and 1001 to the Arizona Parkinson's Disease  
779 Consortium) and the Michael J. Fox Foundation for Parkinsons Research. Diagrams included  
780 in the figures were created with Biorender.com. This work was funded by Alzheimer's Society  
781 (AS-PG-17-006), MRC (MR/S012125/1 and MR/M024083/1), Alzheimer's Research UK  
782 (ARUK-PG2018A-002).

### 783 **AUTHOR CONTRIBUTIONS**

784 N.M.-F., M.P. and P.C.S. contributed to the conception and design of the study and the  
785 interpretation of the results. N.M.-F. and M.P. generated and analyzed the results. F.M.  
786 conducted and analyzed patch-clamp recording experiments. I.W. performed plaque staining  
787 in AD mouse brains and contributed to synapse analyses. K.C., D.I., G.L., and V.E.-P.  
788 performed human RNAseq studies. N.M.-F., M.P. and P.C.S. prepared the figures and wrote  
789 the manuscript. All authors reviewed and approved the final version of this manuscript.

790

### 791 **DECLARATION OF INTERESTS**

792 The authors declare no competing interests.

### 793 **DATA AND MATERIALS AVAILABILITY**

794 All data are available in the main text or the supplementary materials.

795 **REFERENCES**

- 796 Abarzua F, Sakaguchi M, Takaishi M, Nasu Y, Kurose K, Ebara S, Miyazaki M, Namba M,  
797 Kumon H, Huh N. 2005. Adenovirus-mediated overexpression of REIC/Dkk-3  
798 selectively induces apoptosis in human prostate cancer cells through activation of c-  
799 Jun-NH2-kinase. *Cancer Research* **65**:9617–9622. doi:10.1158/0008-5472.CAN-05-  
800 0829
- 801 Alarcón MA, Medina MA, Hu Q, Avila ME, Bustos BI, Pérez-Palma E, Peralta A, Salazar P,  
802 Ugarte GD, Reyes AE, Martin GM, Opazo C, Moon RT, De Ferrari GV. 2013. A novel  
803 functional low-density lipoprotein receptor-related protein 6 gene alternative splice  
804 variant is associated with Alzheimer's disease. *Neurobiology of Aging* **34**:1709.e9–18.  
805 doi:10.1016/j.neurobiolaging.2012.11.004
- 806 Allen M, Carrasquillo MM, Funk C, Heavner BD, Zou F, Younkin CS, Burgess JD, Chai H-S,  
807 Crook J, Eddy JA, Li H, Logsdon B, Peters MA, Dang KK, Wang X, Serie D, Wang C,  
808 Nguyen T, Lincoln S, Malphrus K, Bisceglia G, Li M, Golde TE, Mangravite LM,  
809 Asmann Y, Price ND, Petersen RC, Graff-Radford NR, Dickson DW, Younkin SG,  
810 Ertekin-Taner N. 2016. Human whole genome genotype and transcriptome data for  
811 Alzheimer's and other neurodegenerative diseases. *Scientific data* **3**:160089.  
812 doi:10.1038/sdata.2016.89
- 813 Barrantes I del B, Montero-Pedrazuela A, Guadaño-Ferraz A, Obregon M-J, Martinez de Mena  
814 R, Gailus-Durner V, Fuchs H, Franz TJ, Kalaydjiev S, Klempt M, Hölter S, Rathkolb B,  
815 Reinhard C, Morreale de Escobar G, Bernal J, Busch DH, Wurst W, Wolf E, Schulz H,  
816 Shtrom S, Greiner E, Hrabé de Angelis M, Westphal H, Niehrs C. 2006. Generation  
817 and characterization of dickkopf3 mutant mice. *Molecular and Cellular Biology*  
818 **26**:2317–2326. doi:10.1128/MCB.26.6.2317-2326.2006
- 819 Braak H, Alafuzoff I, Arzberger T, Kretschmar H, Del Tredici K. 2006. Staging of Alzheimer  
820 disease-associated neurofibrillary pathology using paraffin sections and  
821 immunocytochemistry. *Acta Neuropathologica* **112**:389–404. doi:10.1007/s00401-  
822 006-0127-z
- 823 Brewer WJ, Xet-Mull AM, Yu A, Sweeney MI, Walton EM, Tobin DM. 2022. Macrophage  
824 NFATC2 mediates angiogenic signaling during mycobacterial infection. *Cell Reports*  
825 **41**:111817. doi:10.1016/j.celrep.2022.111817
- 826 Bruggink KA, Kuiperij HB, Gloerich J, Otte-Höller I, Rozemuller AJM, Claassen JAHR, Küsters  
827 B, Verbeek MM. 2015. Dickkopf-related protein 3 is a potential A $\beta$ -associated  
828 protein in Alzheimer's Disease. *Journal of Neurochemistry* **134**:1152–1162.  
829 doi:10.1111/jnc.13216
- 830 Caneparo L, Huang Y-L, Staudt N, Tada M, Ahrendt R, Kazanskaya O, Niehrs C, Houart C.  
831 2007. Dickkopf-1 regulates gastrulation movements by coordinated modulation of  
832 Wnt/beta catenin and Wnt/PCP activities, through interaction with the Dally-like  
833 homolog Knypek. *Genes & Development* **21**:465–480. doi:10.1101/gad.406007
- 834 Caricasole A, Copani A, Caraci F, Aronica E, Rozemuller AJ, Caruso A, Storto M, Gaviraghi  
835 G, Terstappen GC, Nicoletti F. 2004. Induction of Dickkopf-1, a negative modulator of  
836 the Wnt pathway, is associated with neuronal degeneration in Alzheimer's brain. *The*  
837 *Journal of Neuroscience* **24**:6021–6027. doi:10.1523/JNEUROSCI.1381-04.2004
- 838 Caricasole A, Ferraro T, Iacovelli L, Barletta E, Caruso A, Melchiorri D, Terstappen GC,  
839 Nicoletti F. 2003. Functional characterization of WNT7A signaling in PC12 cells:  
840 interaction with A FZD5 x LRP6 receptor complex and modulation by Dickkopf proteins.  
841 *The Journal of Biological Chemistry* **278**:37024–37031. doi:10.1074/jbc.M300191200
- 842 Ciani L, Boyle KA, Dickins E, Sahores M, Anane D, Lopes DM, Gibb AJ, Salinas PC. 2011.  
843 Wnt7a signaling promotes dendritic spine growth and synaptic strength through  
844 Ca<sup>2+</sup>/Calmodulin-dependent protein kinase II. *Proceedings of the National Academy of*  
845 *Sciences of the United States of America* **108**:10732–10737.  
846 doi:10.1073/pnas.1018132108

- 847 Clements JD, Bekkers JM. 1997. Detection of spontaneous synaptic events with an optimally  
848 scaled template. *Biophysical Journal* **73**:220–229. doi:10.1016/S0006-  
849 3495(97)78062-7
- 850 De Ferrari GV, Papassotiropoulos A, Biechele T, Wavrant De-Vrieze F, Avila ME, Major MB,  
851 Myers A, Sáez K, Henríquez JP, Zhao A, Wollmer MA, Nitsch RM, Hock C, Morris CM,  
852 Hardy J, Moon RT. 2007. Common genetic variation within the low-density lipoprotein  
853 receptor-related protein 6 and late-onset Alzheimer's disease. *Proceedings of the*  
854 *National Academy of Sciences of the United States of America* **104**:9434–9439.  
855 doi:10.1073/pnas.0603523104
- 856 De Jager PL, Ma Y, McCabe C, Xu J, Vardarajan BN, Felsky D, Klein H-U, White CC, Peters  
857 MA, Lodgson B, Nejad P, Tang A, Mangravite LM, Yu L, Gaiteri C, Mostafavi S,  
858 Schneider JA, Bennett DA. 2018. A multi-omic atlas of the human frontal cortex for  
859 aging and Alzheimer's disease research. *Scientific data* **5**:180142.  
860 doi:10.1038/sdata.2018.142
- 861 DeLuca DS, Levin JZ, Sivachenko A, Fennell T, Nazaire M-D, Williams C, Reich M, Winckler  
862 W, Getz G. 2012. RNA-SeQC: RNA-seq metrics for quality control and process  
863 optimization. *Bioinformatics* **28**:1530–1532. doi:10.1093/bioinformatics/bts196
- 864 Deuker L, Doeller CF, Fell J, Axmacher N. 2014. Human neuroimaging studies on the  
865 hippocampal CA3 region - integrating evidence for pattern separation and completion.  
866 *Frontiers in Cellular Neuroscience* **8**:64. doi:10.3389/fncel.2014.00064
- 867 Drummond E, Nayak S, Faustin A, Pires G, Hickman RA, Askenazi M, Cohen M, Haldiman T,  
868 Kim C, Han X, Shao Y, Safar JG, Ueberheide B, Wisniewski T. 2017. Proteomic  
869 differences in amyloid plaques in rapidly progressive and sporadic Alzheimer's  
870 disease. *Acta Neuropathologica* **133**:933–954. doi:10.1007/s00401-017-1691-0
- 871 Galli S, Lopes DM, Ammari R, Kopra J, Millar SE, Gibb A, Salinas PC. 2014. Deficient Wnt  
872 signalling triggers striatal synaptic degeneration and impaired motor behaviour in adult  
873 mice. *Nature Communications* **5**:4992. doi:10.1038/ncomms5992
- 874 Galli S, Stancheva SH, Dufor T, Gibb AJ, Salinas PC. 2021. Striatal synapse degeneration  
875 and dysfunction are reversed by reactivation of wnt signaling. *Frontiers in synaptic*  
876 *neuroscience* **13**:670467. doi:10.3389/fnsyn.2021.670467
- 877 Gomez-Suaga P, Mórotz GM, Markovinovic A, Martín-Guerrero SM, Preza E, Arias N, Mayl  
878 K, Aabdien A, Gesheva V, Nishimura A, Annibali A, Lee Y, Mitchell JC, Wray S, Shaw  
879 C, Noble W, Miller CCJ. 2022. Disruption of ER-mitochondria tethering and signalling  
880 in C9orf72-associated amyotrophic lateral sclerosis and frontotemporal dementia.  
881 *Aging Cell* **21**:e13549. doi:10.1111/accel.13549
- 882 He Q, Duguid I, Clark B, Panzanelli P, Patel B, Thomas P, Fritschy J-M, Smart TG. 2015.  
883 Interneuron- and GABA(A) receptor-specific inhibitory synaptic plasticity in cerebellar  
884 Purkinje cells. *Nature Communications* **6**:7364. doi:10.1038/ncomms8364
- 885 Hesse R, Hurtado ML, Jackson RJ, Eaton SL, Herrmann AG, Colom-Cadena M, Tzioras M,  
886 King D, Rose J, Tulloch J, McKenzie C-A, Smith C, Henstridge CM, Lamont D, Wishart  
887 TM, Spires-Jones TL. 2019. Comparative profiling of the synaptic proteome from  
888 Alzheimer's disease patients with focus on the APOE genotype. *Acta neuropathologica*  
889 *communications* **7**:214. doi:10.1186/s40478-019-0847-7
- 890 Hong S, Beja-Glasser VF, Nfonoyim BM, Frouin A, Li S, Ramakrishnan S, Merry KM, Shi Q,  
891 Rosenthal A, Barres BA, Lemere CA, Selkoe DJ, Stevens B. 2016. Complement and  
892 microglia mediate early synapse loss in Alzheimer mouse models. *Science* **352**:712–  
893 716. doi:10.1126/science.aad8373
- 894 Hu N-W, Klyubin I, Anwyl R, Rowan MJ. 2009. GluN2B subunit-containing NMDA receptor  
895 antagonists prevent Abeta-mediated synaptic plasticity disruption in vivo. *Proceedings*  
896 *of the National Academy of Sciences of the United States of America* **106**:20504–  
897 20509. doi:10.1073/pnas.0908083106
- 898 Jack CR, Bennett DA, Blennow K, Carrillo MC, Dunn B, Haeberlein SB, Holtzman DM, Jagust  
899 W, Jessen F, Karlawish J, Liu E, Molinuevo JL, Montine T, Phelps C, Rankin KP, Rowe  
900 CC, Scheltens P, Siemers E, Snyder HM, Sperling R, Contributors, Elliott C, Masliah  
901 E, Ryan L, Silverberg N. 2018. NIA-AA Research Framework: Toward a biological

- 902 definition of Alzheimer's disease. *Alzheimer's & Dementia* **14**:535–562.  
903 doi:10.1016/j.jalz.2018.02.018
- 904 Johnson ECB, Carter EK, Dammer EB, Duong DM, Gerasimov ES, Liu Y, Liu J, Betarbet R,  
905 Ping L, Yin L, Serrano GE, Beach TG, Peng J, De Jager PL, Haroutunian V, Zhang B,  
906 Gaiteri C, Bennett DA, Gearing M, Wingo TS, Wingo AP, Lah JJ, Levey AI, Seyfried  
907 NT. 2022. Large-scale deep multi-layer analysis of Alzheimer's disease brain reveals  
908 strong proteomic disease-related changes not observed at the RNA level. *Nat*  
909 *Neurosci* **25**:213–225. doi:10.1038/s41593-021-00999-y
- 910 Jones ME, Büchler J, Dufor T, Palomer E, Teo S, Martin-Flores N, Boroviak K, Metzakopian  
911 E, Gibb A, Salinas PC. 2023. A genetic variant of the Wnt receptor LRP6 accelerates  
912 synapse degeneration during aging and in Alzheimer's disease. *Sci Adv* **9**:eabo7421.  
913 doi:10.1126/sciadv.abo7421
- 914 Kamal A, Ramakers GM, Urban IJ, De Graan PN, Gispen WH. 1999. Chemical LTD in the  
915 CA1 field of the hippocampus from young and mature rats. *The European Journal of*  
916 *Neuroscience* **11**:3512–3516. doi:10.1046/j.1460-9568.1999.00769.x
- 917 Katsinelos T, Zeitler M, Dimou E, Karakatsani A, Müller H-M, Nachman E, Steringer JP, Ruiz  
918 de Almodovar C, Nickel W, Jahn TR. 2018. Unconventional Secretion Mediates the  
919 Trans-cellular Spreading of Tau. *Cell Reports* **23**:2039–2055.  
920 doi:10.1016/j.celrep.2018.04.056
- 921 Killick R, Ribe EM, Al-Shawi R, Malik B, Hooper C, Fernandes C, Dobson R, Nolan PM,  
922 Lourdasamy A, Furney S, Lin K, Breen G, Wroe R, To AWM, Leroy K, Causevic M,  
923 Usardi A, Robinson M, Noble W, Williamson R, Lunnon K, Kellie S, Reynolds CH,  
924 Bazenet C, Hodges A, Brion J-P, Stephenson J, Simons JP, Lovestone S. 2014.  
925 Clusterin regulates  $\beta$ -amyloid toxicity via Dickkopf-1-driven induction of the wnt-  
926 PCP-JNK pathway. *Molecular Psychiatry* **19**:88–98. doi:10.1038/mp.2012.163
- 927 Koffie RM, Hashimoto T, Tai H-C, Kay KR, Serrano-Pozo A, Joyner D, Hou S, Kopeikina KJ,  
928 Frosch MP, Lee VM, Holtzman DM, Hyman BT, Spires-Jones TL. 2012. Apolipoprotein  
929 E4 effects in Alzheimer's disease are mediated by synaptotoxic oligomeric amyloid-  
930  $\beta$ . *Brain: A Journal of Neurology* **135**:2155–2168. doi:10.1093/brain/aws127
- 931 Krupnik VE, Sharp JD, Jiang C, Robison K, Chickering TW, Amaravadi L, Brown DE, Guyot  
932 D, Mays G, Leiby K, Chang B, Duong T, Goodearl AD, Gearing DP, Sokol SY,  
933 McCarthy SA. 1999. Functional and structural diversity of the human Dickkopf gene  
934 family. *Gene* **238**:301–313. doi:10.1016/S0378-1119(99)00365-0
- 935 Leroy K, Yilmaz Z, Brion J-P. 2007. Increased level of active GSK-3 $\beta$  in Alzheimer's  
936 disease and accumulation in argyrophilic grains and in neurones at different stages of  
937 neurofibrillary degeneration. *Neuropathol Appl Neurobiol* **33**:43–55.  
938 doi:10.1111/j.1365-2990.2006.00795.x
- 939 Li S, Jin M, Koeglsperger T, Shepardson NE, Shankar GM, Selkoe DJ. 2011. Soluble A $\beta$   
940 oligomers inhibit long-term potentiation through a mechanism involving excessive  
941 activation of extrasynaptic NR2B-containing NMDA receptors. *The Journal of*  
942 *Neuroscience* **31**:6627–6638. doi:10.1523/JNEUROSCI.0203-11.2011
- 943 Liu C-C, Tsai C-W, Deak F, Rogers J, Penuliar M, Sung YM, Maher JN, Fu Y, Li X, Xu H,  
944 Estus S, Hoe H-S, Fryer JD, Kanekiyo T, Bu G. 2014. Deficiency in LRP6-mediated  
945 Wnt signaling contributes to synaptic abnormalities and amyloid pathology in  
946 Alzheimer's disease. *Neuron* **84**:63–77. doi:10.1016/j.neuron.2014.08.048
- 947 Ly PTT, Cai F, Song W. 2011. Detection of neuritic plaques in Alzheimer's disease mouse  
948 model. *Journal of Visualized Experiments*. doi:10.3791/2831
- 949 Marzo A, Galli S, Lopes D, McLeod F, Podpolny M, Segovia-Roldan M, Ciani L, Purro S,  
950 Cacucci F, Gibb A, Salinas PC. 2016. Reversal of synapse degeneration by restoring  
951 wnt signaling in the adult hippocampus. *Current Biology* **26**:2551–2561.  
952 doi:10.1016/j.cub.2016.07.024
- 953 McLeod F, Bossio A, Marzo A, Ciani L, Sibilla S, Hannan S, Wilson GA, Palomer E, Smart  
954 TG, Gibb A, Salinas PC. 2018. Wnt Signaling Mediates LTP-Dependent Spine  
955 Plasticity and AMPAR Localization through Frizzled-7 Receptors. *Cell reports*  
956 **23**:1060–1071. doi:10.1016/j.celrep.2018.03.119

- 957 McLeod F, Marzo A, Podpolny M, Galli S, Salinas P. 2017. Evaluation of synapse density in  
958 hippocampal rodent brain slices. *Journal of Visualized Experiments*.  
959 doi:10.3791/56153
- 960 McLeod F, Salinas PC. 2018. Wnt proteins as modulators of synaptic plasticity. *Current*  
961 *Opinion in Neurobiology* **53**:90–95. doi:10.1016/j.conb.2018.06.003
- 962 Meilandt WJ, Cisse M, Ho K, Wu T, Esposito LA, Searce-Levie K, Cheng IH, Yu G-Q, Mucke  
963 L. 2009. Neprilysin overexpression inhibits plaque formation but fails to reduce  
964 pathogenic Aβ oligomers and associated cognitive deficits in human amyloid  
965 precursor protein transgenic mice. *The Journal of Neuroscience* **29**:1977–1986.  
966 doi:10.1523/JNEUROSCI.2984-08.2009
- 967 Meister M, Papatiantafyllou M, Nordström V, Kumar V, Ludwig J, Lui KO, Boyd AS, Popovic  
968 ZV, Fleming TH, Moldenhauer G, Nawroth PP, Gröne H-J, Waldmann H, Oelert T,  
969 Arnold B. 2015. Dickkopf-3, a tissue-derived modulator of local T-cell responses.  
970 *Frontiers in Immunology* **6**:78. doi:10.3389/fimmu.2015.00078
- 971 Mirra SS, Heyman A, McKeel D, Sumi SM, Crain BJ, Brownlee LM, Vogel FS, Hughes JP, van  
972 Belle G, Berg L. 1991. The Consortium to Establish a Registry for Alzheimer’s Disease  
973 (CERAD). Part II. Standardization of the neuropathologic assessment of Alzheimer’s  
974 disease. *Neurology* **41**:479–486. doi:10.1212/wnl.41.4.479
- 975 Mizobuchi Y, Matsuzaki K, Kuwayama K, Kitazato K, Mure H, Kageji T, Nagahiro S. 2008.  
976 REIC/Dkk-3 induces cell death in human malignant glioma. *Neuro-oncology* **10**:244–  
977 253. doi:10.1215/15228517-2008-016
- 978 Mucke L, Masliah E, Yu GQ, Mallory M, Rockenstein EM, Tatsuno G, Hu K, Kholodenko D,  
979 Johnson-Wood K, McConlogue L. 2000a. High-level neuronal expression of abeta 1-  
980 42 in wild-type human amyloid protein precursor transgenic mice: synaptotoxicity  
981 without plaque formation. *The Journal of Neuroscience* **20**:4050–4058.
- 982 Mucke L, Selkoe DJ. 2012. Neurotoxicity of amyloid β-protein: synaptic and network  
983 dysfunction. *Cold Spring Harbor perspectives in medicine* **2**:a006338.  
984 doi:10.1101/cshperspect.a006338
- 985 Mucke L, Yu GQ, McConlogue L, Rockenstein EM, Abraham CR, Masliah E. 2000b. Astroglial  
986 expression of human alpha(1)-antichymotrypsin enhances alzheimer-like pathology in  
987 amyloid protein precursor transgenic mice. *The American Journal of Pathology*  
988 **157**:2003–2010. doi:10.1016/s0002-9440(10)64839-0
- 989 Niehrs C. 2012. The complex world of WNT receptor signalling. *Nature Reviews Molecular*  
990 *Cell Biology* **13**:767–779. doi:10.1038/nrm3470
- 991 Niehrs C. 2006. Function and biological roles of the Dickkopf family of Wnt modulators.  
992 *Oncogene* **25**:7469–7481. doi:10.1038/sj.onc.1210054
- 993 Nusse R, Clevers H. 2017. Wnt/β-Catenin Signaling, Disease, and Emerging Therapeutic  
994 Modalities. *Cell* **169**:985–999. doi:10.1016/j.cell.2017.05.016
- 995 Palomer E, Martín-Flores N, Jolly S, Pascual-Vargas P, Benvegnù S, Podpolny M, Teo S,  
996 Vaher K, Saito T, Saido TC, Whiting P, Salinas PC. 2022. Epigenetic repression of  
997 Wnt receptors in AD: a role for Sirtuin2-induced H4K16ac deacetylation of Frizzled1  
998 and Frizzled7 promoters. *Molecular Psychiatry*. doi:10.1038/s41380-022-01492-z
- 999 Plantevin Krenitsky V, Nadolny L, Delgado M, Ayala L, Clareen SS, Hilgraf R, Albers R, Hegde  
1000 S, D’Sidocky N, Sapienza J, Wright J, McCarrick M, Bahmanyar S, Chamberlain P,  
1001 Delker SL, Muir J, Giegel D, Xu L, Celeridad M, Lachowitz J, Bennett B, Moghaddam  
1002 M, Khatsenko O, Katz J, Fan R, Bai A, Tang Y, Shirley MA, Benish B, Bodine T, Blease  
1003 K, Raymon H, Cathers BE, Satoh Y. 2012. Discovery of CC-930, an orally active anti-  
1004 fibrotic JNK inhibitor. *Bioorganic & Medicinal Chemistry Letters* **22**:1433–1438.  
1005 doi:10.1016/j.bmcl.2011.12.027
- 1006 Purro SA, Dickins EM, Salinas PC. 2012. The secreted Wnt antagonist Dickkopf-1 is required  
1007 for amyloid β-mediated synaptic loss. *The Journal of Neuroscience* **32**:3492–3498.  
1008 doi:10.1523/JNEUROSCI.4562-11.2012
- 1009 Redlingshöfer L, McLeod F, Chen Y, Camus MD, Burden JJ, Palomer E, Briant K, Dannhauser  
1010 PN, Salinas PC, Brodsky FM. 2020. Clathrin light chain diversity regulates membrane  
1011 deformation in vitro and synaptic vesicle formation in vivo. *Proceedings of the National*

- 1012 *Academy of Sciences of the United States of America* **117**:23527–23538.  
1013 doi:10.1073/pnas.2003662117
- 1014 Ring DB, Johnson KW, Henriksen EJ, Nuss JM, Goff D, Kinnick TR, Ma ST, Reeder JW,  
1015 Samuels I, Slabiak T, Wagman AS, Hammond M-EW, Harrison SD. 2003. Selective  
1016 glycogen synthase kinase 3 inhibitors potentiate insulin activation of glucose transport  
1017 and utilization in vitro and in vivo. *Diabetes* **52**:588–595.  
1018 doi:10.2337/diabetes.52.3.588
- 1019 Rosi MC, Luccarini I, Grossi C, Fiorentini A, Spillantini MG, Prisco A, Scali C, Gianfriddo M,  
1020 Caricasole A, Terstappen GC, Casamenti F. 2010. Increased Dickkopf-1 expression  
1021 in transgenic mouse models of neurodegenerative disease. *Journal of Neurochemistry*  
1022 **112**:1539–1551. doi:10.1111/j.1471-4159.2009.06566.x
- 1023 Saito T, Matsuba Y, Mihira N, Takano J, Nilsson P, Itohara S, Iwata N, Saido TC. 2014. Single  
1024 App knock-in mouse models of Alzheimer's disease. *Nature Neuroscience* **17**:661–  
1025 663. doi:10.1038/nn.3697
- 1026 Selkoe DJ, Hardy J. 2016. The amyloid hypothesis of Alzheimer's disease at 25 years. *EMBO*  
1027 *Molecular Medicine* **8**:595–608. doi:10.15252/emmm.201606210
- 1028 Sellers KJ, Elliott C, Jackson J, Ghosh A, Ribe E, Rojo AI, Jarosz-Griffiths HH, Watson IA, Xia  
1029 W, Semenov M, Morin P, Hooper NM, Porter R, Preston J, Al-Shawi R, Baillie G,  
1030 Lovestone S, Cuadrado A, Harte M, Simons P, Srivastava DP, Killick R. 2018. Amyloid  
1031  $\beta$  synaptotoxicity is Wnt-PCP dependent and blocked by fasudil. *Alzheimer's &*  
1032 *Dementia* **14**:306–317. doi:10.1016/j.jalz.2017.09.008
- 1033 Szabo L, Cummins N, Paganetti P, Odermatt A, Papassotiropoulos A, Karch C, Götz J, Eckert  
1034 A, Grimm A. 2023. ER-mitochondria contacts and cholesterol metabolism are  
1035 disrupted by disease-associated tau protein. *EMBO reports* **24**:e57499.  
1036 doi:10.15252/embr.202357499
- 1037 Thompson CL, Pathak SD, Jeromin A, Ng LL, MacPherson CR, Mortrud MT, Cusick A, Riley  
1038 ZL, Sunkin SM, Bernard A, Puchalski RB, Gage FH, Jones AR, Bajic VB, Hawrylycz  
1039 MJ, Lein ES. 2008. Genomic anatomy of the hippocampus. *Neuron* **60**:1010–1021.  
1040 doi:10.1016/j.neuron.2008.12.008
- 1041 Walsh DM, Klyubin I, Fadeeva JV, Cullen WK, Anwyl R, Wolfe MS, Rowan MJ, Selkoe DJ.  
1042 2002. Naturally secreted oligomers of amyloid beta protein potently inhibit  
1043 hippocampal long-term potentiation in vivo. *Nature* **416**:535–539.  
1044 doi:10.1038/416535a
- 1045 Wang M, Beckmann ND, Roussos P, Wang E, Zhou X, Wang Q, Ming C, Neff R, Ma W, Fullard  
1046 JF, Hauberg ME, Bendl J, Peters MA, Logsdon B, Wang P, Mahajan M, Mangravite  
1047 LM, Dammer EB, Duong DM, Lah JJ, Seyfried NT, Levey AI, Buxbaum JD, Ehrlich M,  
1048 Gandy S, Katsel P, Haroutunian V, Schadt E, Zhang B. 2018. The Mount Sinai cohort  
1049 of large-scale genomic, transcriptomic and proteomic data in Alzheimer's disease.  
1050 *Scientific data* **5**:180185. doi:10.1038/sdata.2018.185
- 1051 Xiong F, Ge W, Ma C. 2019. Quantitative proteomics reveals distinct composition of amyloid  
1052 plaques in Alzheimer's disease. *Alzheimer's & Dementia* **15**:429–440.  
1053 doi:10.1016/j.jalz.2018.10.006
- 1054 Xu J, Patassini S, Rustogi N, Riba-Garcia I, Hale BD, Phillips AM, Waldvogel H, Haines R,  
1055 Bradbury P, Stevens A, Faull RLM, Dowsey AW, Cooper GJS, Unwin RD. 2019.  
1056 Regional protein expression in human Alzheimer's brain correlates with disease  
1057 severity. *Communications Biology* **2**:43. doi:10.1038/s42003-018-0254-9
- 1058 Ye C, Walsh DM, Selkoe DJ, Hartley DM. 2004. Amyloid beta-protein induced  
1059 electrophysiological changes are dependent on aggregation state: N-methyl-D-  
1060 aspartate (NMDA) versus non-NMDA receptor/channel activation. *Neuroscience*  
1061 *Letters* **366**:320–325. doi:10.1016/j.neulet.2004.05.060
- 1062 Yu B, Kiechl S, Qi D, Wang X, Song Y, Weger S, Mayr A, Le Bras A, Karamariti E, Zhang Z,  
1063 Barco Barrantes ID, Niehrs C, Schett G, Hu Y, Wang W, Willeit J, Qu A, Xu Q. 2017.  
1064 A Cytokine-Like Protein Dickkopf-Related Protein 3 Is Atheroprotective. *Circulation*  
1065 **136**:1022–1036. doi:10.1161/CIRCULATIONAHA.117.027690

- 1066 Zhang Li, Sun C, Jin Y, Gao K, Shi X, Qiu W, Ma C, Zhang Lianfeng. 2017. Dickkopf 3 (Dkk3)  
1067 Improves Amyloid- $\beta$  Pathology, Cognitive Dysfunction, and Cerebral Glucose  
1068 Metabolism in a Transgenic Mouse Model of Alzheimer's Disease. *Journal of*  
1069 *Alzheimer's Disease* **60**:733–746. doi:10.3233/JAD-161254
- 1070 Zhang Y, Chen K, Sloan SA, Bennett ML, Scholze AR, O'Keeffe S, Phatnani HP, Guarnieri P,  
1071 Caneda C, Ruderisch N, Deng S, Liddelow SA, Zhang C, Daneman R, Maniatis T,  
1072 Barres BA, Wu JQ. 2014. An RNA-sequencing transcriptome and splicing database of  
1073 glia, neurons, and vascular cells of the cerebral cortex. *The Journal of Neuroscience*  
1074 **34**:11929–11947. doi:10.1523/JNEUROSCI.1860-14.2014
- 1075 Zhu Y, Demidov ON, Goh AM, Virshup DM, Lane DP, Bulavin DV. 2014. Phosphatase WIP1  
1076 regulates adult neurogenesis and WNT signaling during aging. *The Journal of Clinical*  
1077 *Investigation* **124**:3263–3273. doi:10.1172/JCI73015
- 1078
- 1079

1080 **MAIN FIGURES**

1081

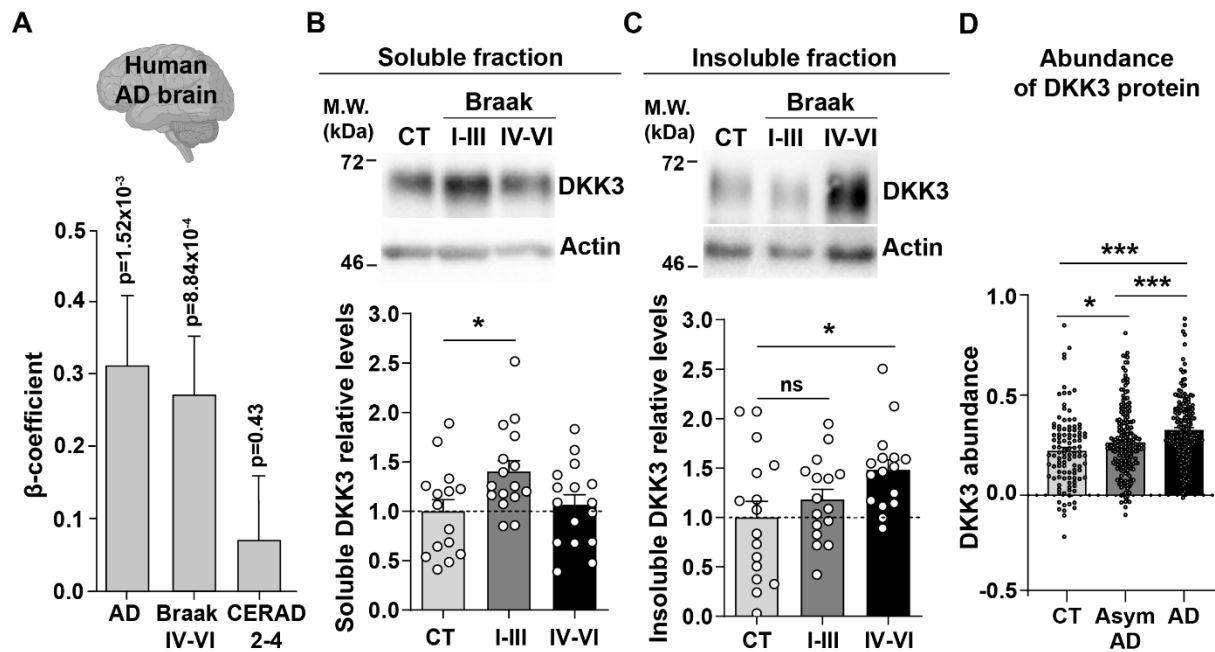

1082 **Figure 1**

1082

1083 **Figure 1. DKK3 mRNA and protein levels are increased in the human AD brain.**

1084 **(A)** Temporal cortex RNAseq dataset logistic regression shows that *DKK3* mRNA levels are  
1085 increased in AD cases relative to controls. Ordinal regression shows that *DKK3* is differentially  
1086 expressed for Braak scores IV-VI but not for CERAD scores 2-4.

1087 **(B, C)** Representative immunoblots of DKK3 and loading control actin in **(B)** soluble and **(C)**  
1088 insoluble protein fractions from the hippocampus of control (CT;  $n = 15-16$ ), Braak stages I-III  
1089 ( $n = 16$ ), and Braak stage IV-VI ( $n = 16$ ) individuals (One-Way ANOVA test followed by Tukey's  
1090 multiple comparisons). See also **Table S1**.

1091 **(D)** Abundance of DKK3 protein in dorsolateral prefrontal cortex from control (CT,  $n = 106$ ,  
1092 asymptomatic (Asym) AD ( $n = 200$ ), and AD ( $n = 182$ ) individuals was evaluated using a  
1093 tandem mass tag mass spectrometry (TMT-MS) proteomic dataset study (Johnson et al.,  
1094 2022) (ANOVA with two-sided Holm correction, AD vs CT  $p$ -value = 0.00000168, Asym AD  
1095 vs. CT  $p$ -value = 0.042492481, AD vs. Asym AD = 0.000402907).



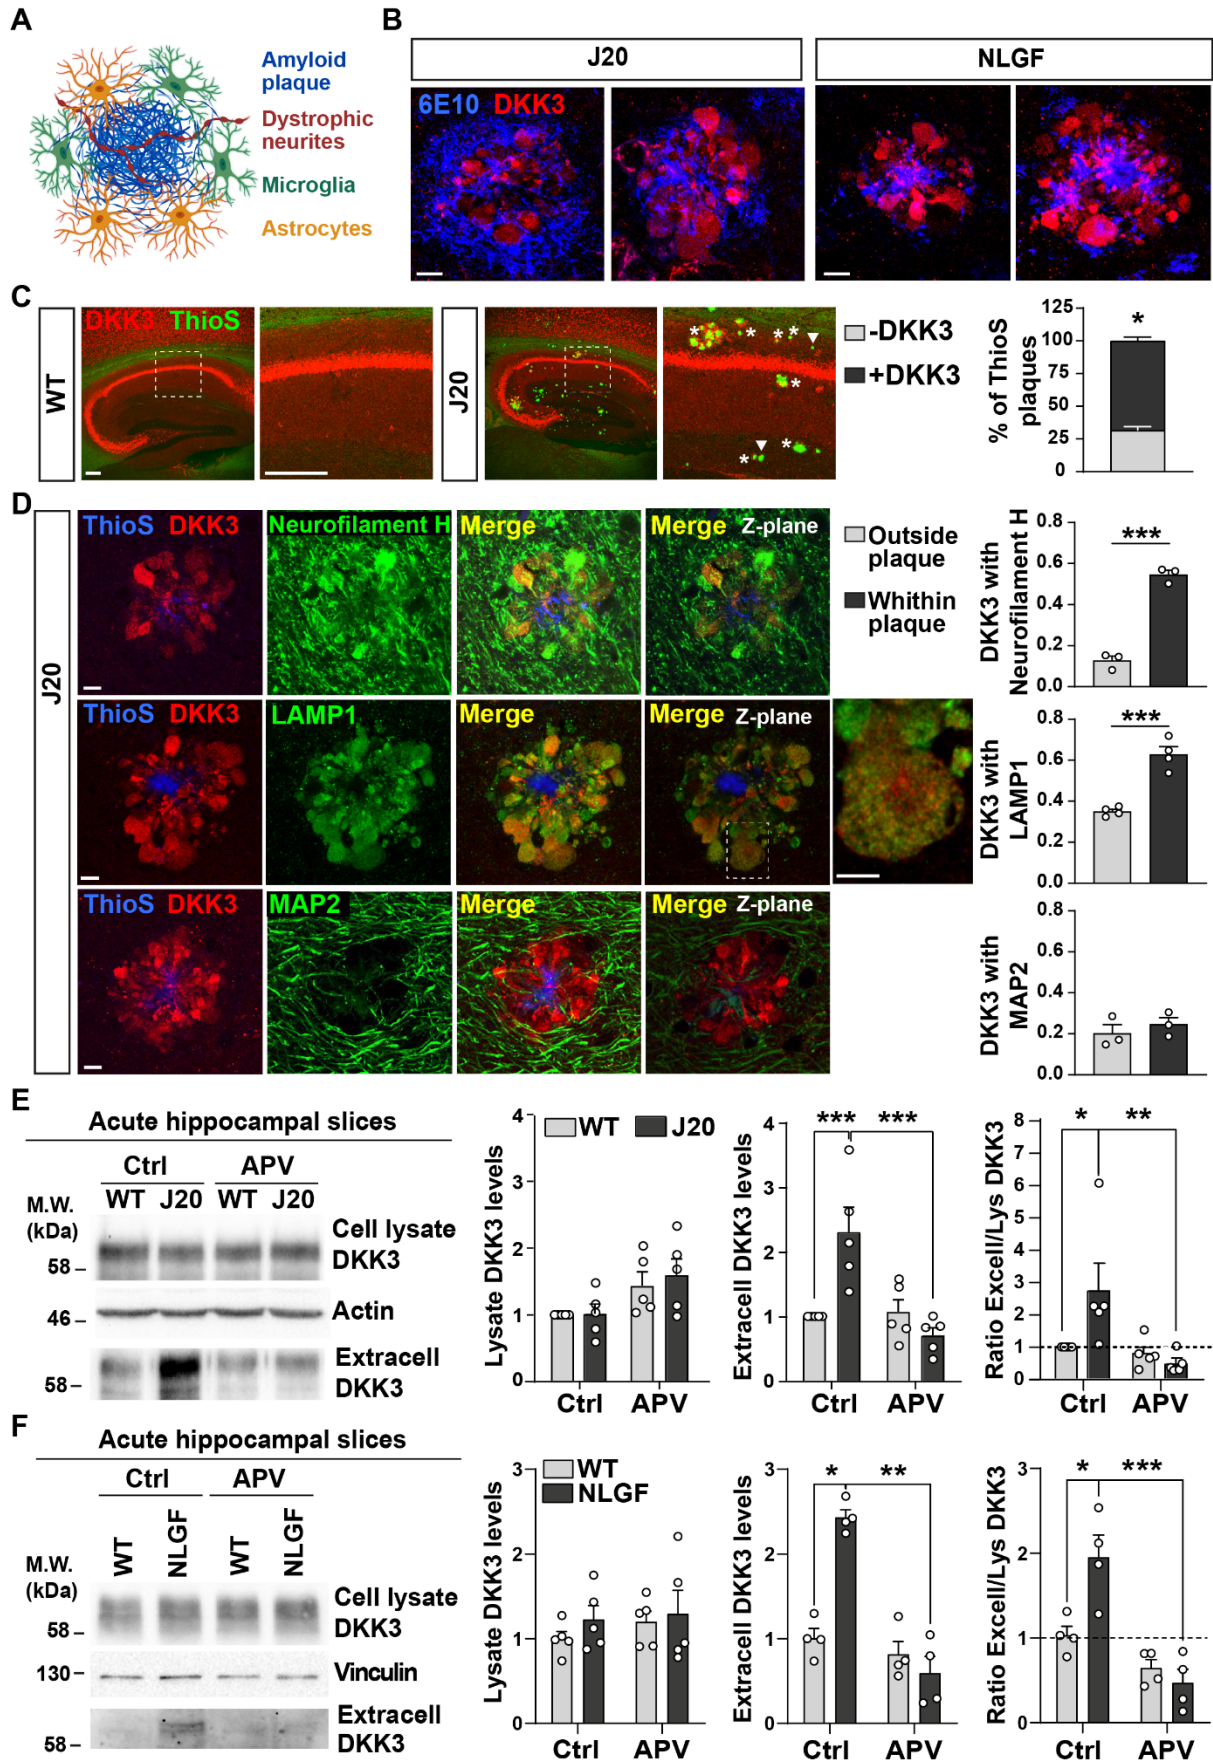

Figure 2

1097 **Figure 2. DKK3 localizes to dystrophic neurites around A $\beta$  plaques, and DKK3**  
1098 **extracellular levels are increased in the brain of AD mouse models.**

1099 **(A)** Diagram of the components of an A $\beta$  plaque (blue), astrocytes (orange), microglia (green),  
1100 and dystrophic neurites (red).

1101 **(B)** Confocal images of DKK3 protein (red) and amyloid plaques stained with the 6E10  
1102 antibody (blue) in the hippocampus of 18-month-old J20 and 8-months NLGF mice. Scale bar  
1103 = 10  $\mu$ m.

1104 **(C)** Confocal images of DKK3 (red) and A $\beta$  plaques labeled by Thioflavin S (ThioS; green) in  
1105 the hippocampus of 18-month-old WT and J20 mice. ThioS+ plaques not containing DKK3 (-  
1106 DKK3; arrowheads), ThioS+ plaques containing DKK3 (+ DKK3; asterisks). Scale bar = 150  
1107  $\mu$ m and 100  $\mu$ m in zoom-in pictures. Graph depicts quantification of the percentage of ThioS+  
1108 plaques containing or not DKK3 (Student's T-test, n = 3 animals per genotype).

1109 **(D)** Z-stack confocal images show that DKK3 (red) accumulates at A $\beta$  plaques (ThioS; blue)  
1110 and colocalizes with atrophic axons (Neurofilament-H; green and LAMP1; green) but not with  
1111 dendrites (MAP2; green). XY views of one plane are shown in the last panel. For LAMP1, a  
1112 zoom-in picture showing colocalization between DKK3 and LAMP1 puncta is shown. Scale  
1113 bar = 6  $\mu$ m. Graphs show Pearson's correlation coefficient between DKK3 and Neurofilament-  
1114 H, LAMP1, or MAP2, n = 3-4 animals.

1115 **(E, F)** Immunoblot images show DKK3 levels in the cell lysate and secreted fraction of acute  
1116 hippocampal slices of **(E)** 3-4-month-old WT and J20 mice or **(F)** 2-3-months old WT and  
1117 NLGF mice. Slices were incubated with vehicle (Ctrl) or APV for 3 hours. Actin or Vinculin was  
1118 used as a loading control in the homogenate. Graphs show densitometric quantifications of  
1119 lysate and extracellular (extracell) DKK3 levels relative to control and the ratio of  
1120 extracellular/lysate DKK3 levels (Two-Way ANOVA followed by Tukey's post-hoc test; n = 4-  
1121 5 animals).

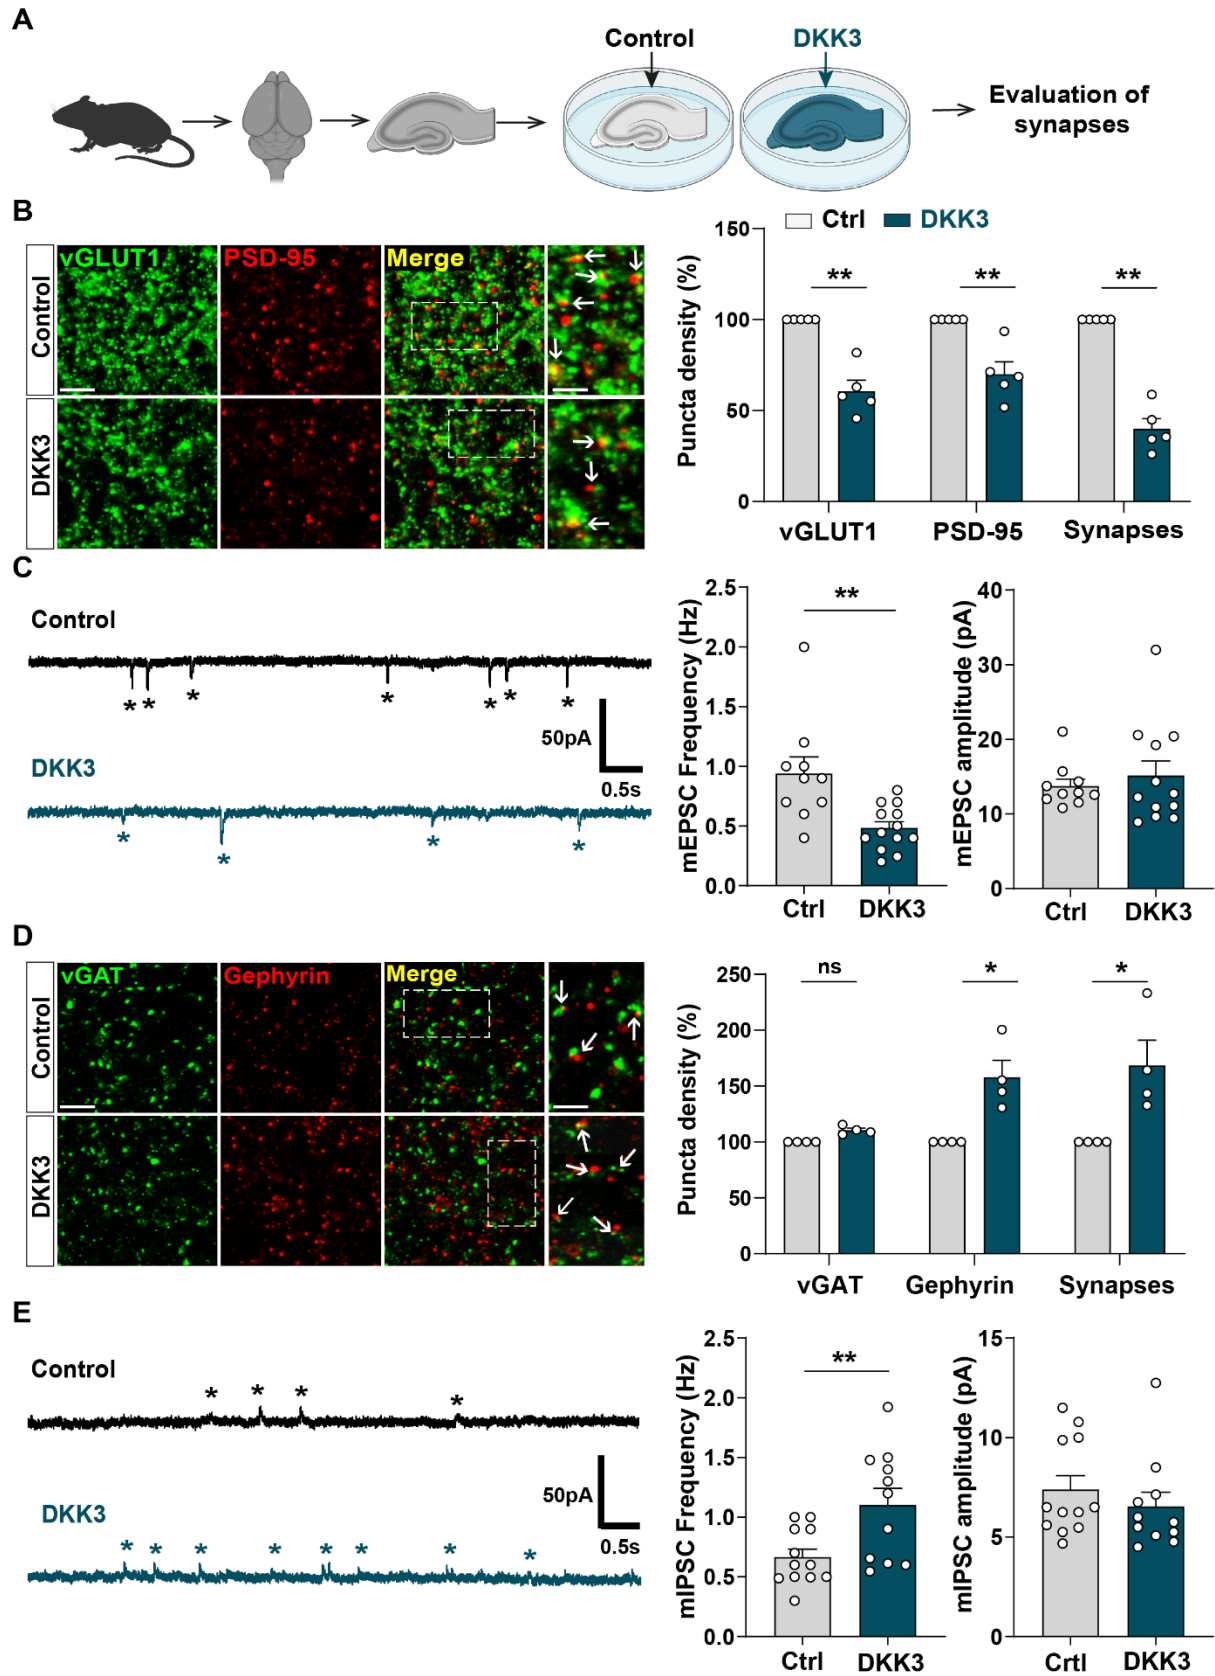

Figure 3

1122

1123

1124 **Figure 3. Gain-of-function of DKK3 leads to opposing effects on the number of**  
1125 **excitatory and inhibitory synapses in the hippocampus.**

1126 (A) Diagram depicting the treatment of hippocampal brain slices obtained from 3-month-old  
1127 adult WT mice with vehicle (Ctrl) or recombinant DKK3 protein. Synapses were evaluated by  
1128 confocal microscopy and electrophysiological recordings.

1129 (B) Confocal images of the CA3 SR region labeled with the presynaptic excitatory marker  
1130 vGLUT1 (green) and the postsynaptic marker PSD-95 (red). Arrows indicate excitatory  
1131 synapses as colocalized pre- and postsynaptic puncta. Scale bar = 5  $\mu\text{m}$  and 2.5  $\mu\text{m}$  in  
1132 zoomed-in pictures. Quantification is shown on the right-hand side (Mann-Whitney test, n = 5  
1133 animals per condition).

1134 (C) Representative mEPSC traces recorded at -60mV from CA3 cells. Stars indicate mEPSC  
1135 events. Quantification of mEPSC frequency and amplitude is shown on the right-hand side  
1136 (Mann-Whitney test, n = 10-13 cells from 5 animals).

1137 (D) Confocal images of the CA3 SR region labeled with the presynaptic inhibitory marker vGAT  
1138 (green) and the postsynaptic marker gephyrin (red). Arrows indicate inhibitory synapses as  
1139 colocalized pre- and postsynaptic puncta. Scale bar = 5  $\mu\text{m}$  and 2.5  $\mu\text{m}$  in zoomed-in pictures.  
1140 Quantification is shown on the right-hand side (Mann-Whitney test, n = 4 animals per  
1141 condition).

1142 (E) Representative mIPSC traces recorded at 0mV from CA3 cells. Stars indicate mIPSC  
1143 events. Quantification of mIPSC frequency and amplitude is shown on the right-hand side  
1144 (Student's T-test for mIPSC frequency and Mann-Whitney test for mIPSC amplitude, n = 11-  
1145 12 cells from 5-7 animals).

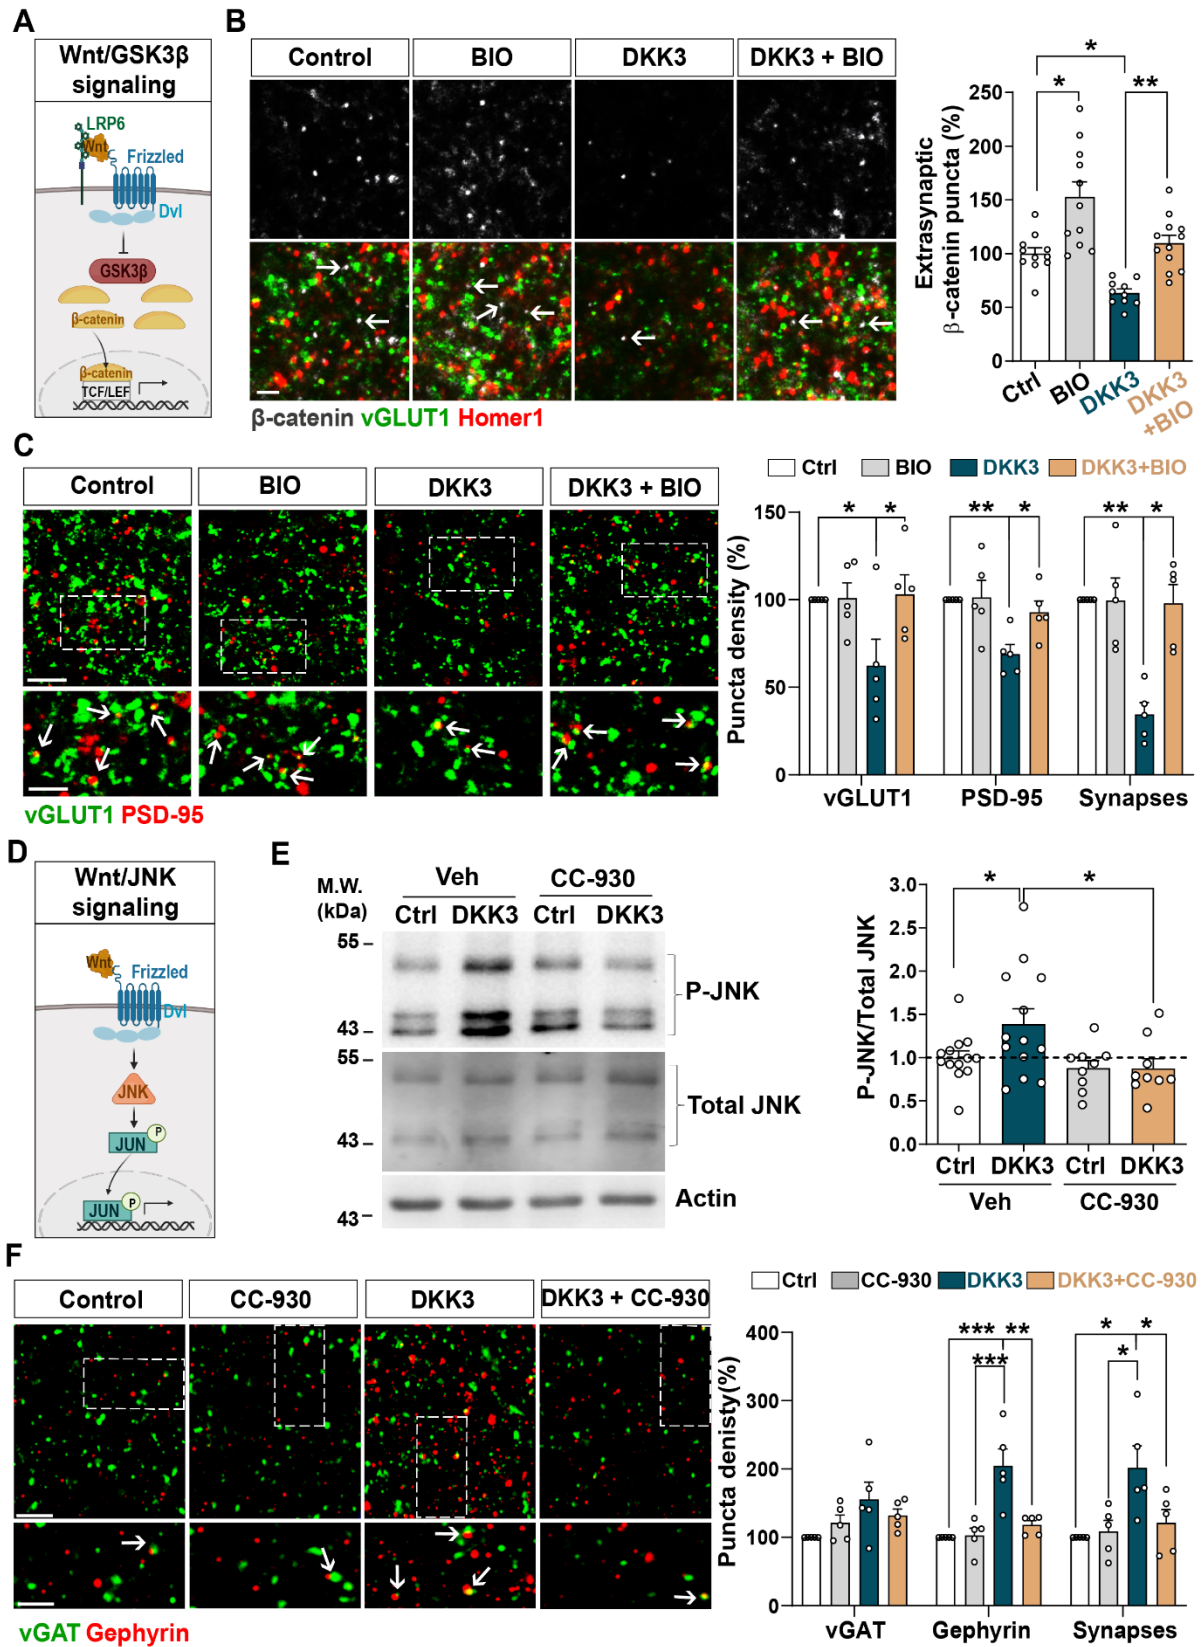

Figure 4

1146

1147

1148 **Figure 4. DKK3 regulates excitatory and inhibitory synapse number through the**  
1149 **Wnt/GSK3 $\beta$  and Wnt/JNK pathways respectively.**

1150 (A) Diagram of the canonical Wnt pathway through inhibition of GSK3 $\beta$  (Wnt/GSK3 $\beta$  pathway),  
1151 resulting in elevation of  $\beta$ -catenin and transcriptional activation via TCF/LEF.

1152 (B) Confocal images show excitatory synapses, visualized by colocalization of vGLUT1  
1153 (green) and Homer1 (red), as well as  $\beta$ -catenin puncta (grey) in the CA3 SR after treatment  
1154 with vehicle (Ctrl) or DKK3 in the absence or presence of BIO. Arrows indicate extra-synaptic  
1155  $\beta$ -catenin puncta. Scale bar = 5  $\mu$ m. Quantification of extrasynaptic  $\beta$ -catenin puncta density  
1156 as a percentage of control is shown on the right-hand side (Two-Way ANOVA followed by  
1157 Tukey's multiple comparisons, n = 2-3 brain slices/animal from 5 animals).

1158 (C) Confocal images show excitatory synapses (co-localized vGLUT1 puncta in green and  
1159 PSD-95 puncta in red) in the CA3 SR after treatment with vehicle (Ctrl) or DKK3 in the absence  
1160 or presence of BIO. Scale bar = 5  $\mu$ m and 2.5  $\mu$ m. Graph shows the quantification of puncta  
1161 density of pre- and postsynaptic markers and excitatory synapses as a percentage of control  
1162 (Kruskal-Wallis followed by Dunn's multiple comparisons, n = 5 animals).

1163 (D) Diagram of the Wnt pathway through activation of JNK (Wnt/JNK pathway), resulting in  
1164 increased levels of phospho-JNK and transcriptional changes.

1165 (E) Representative immunoblots of phospho-JNK Thr183/Tyr185 (P-JNK) and total JNK of  
1166 brain slices treated with DKK3 and/or the JNK inhibitor CC-930. Actin was used as a loading  
1167 control. Graph shows densitometric quantification of P-JNK vs. total JNK relative to the control  
1168 condition (Kruskal-Wallis followed by Dunn's multiple comparisons, n = 2 brain slices/animal  
1169 from 4-5 animals).

1170 (F) Confocal images showing inhibitory synapses defined by the colocalization of vGAT  
1171 (green) and gephyrin (red) puncta in the CA3 SR after treatment with vehicle (Ctrl) or DKK3  
1172 in the absence or presence of CC-930. Scale bar = 5  $\mu$ m and 2.5  $\mu$ m. Graph shows the  
1173 quantification of puncta density of pre and postsynaptic markers and inhibitory synapses as a  
1174 percentage of control (Kruskal-Wallis followed by Dunn's multiple comparisons, n = 5 animals).

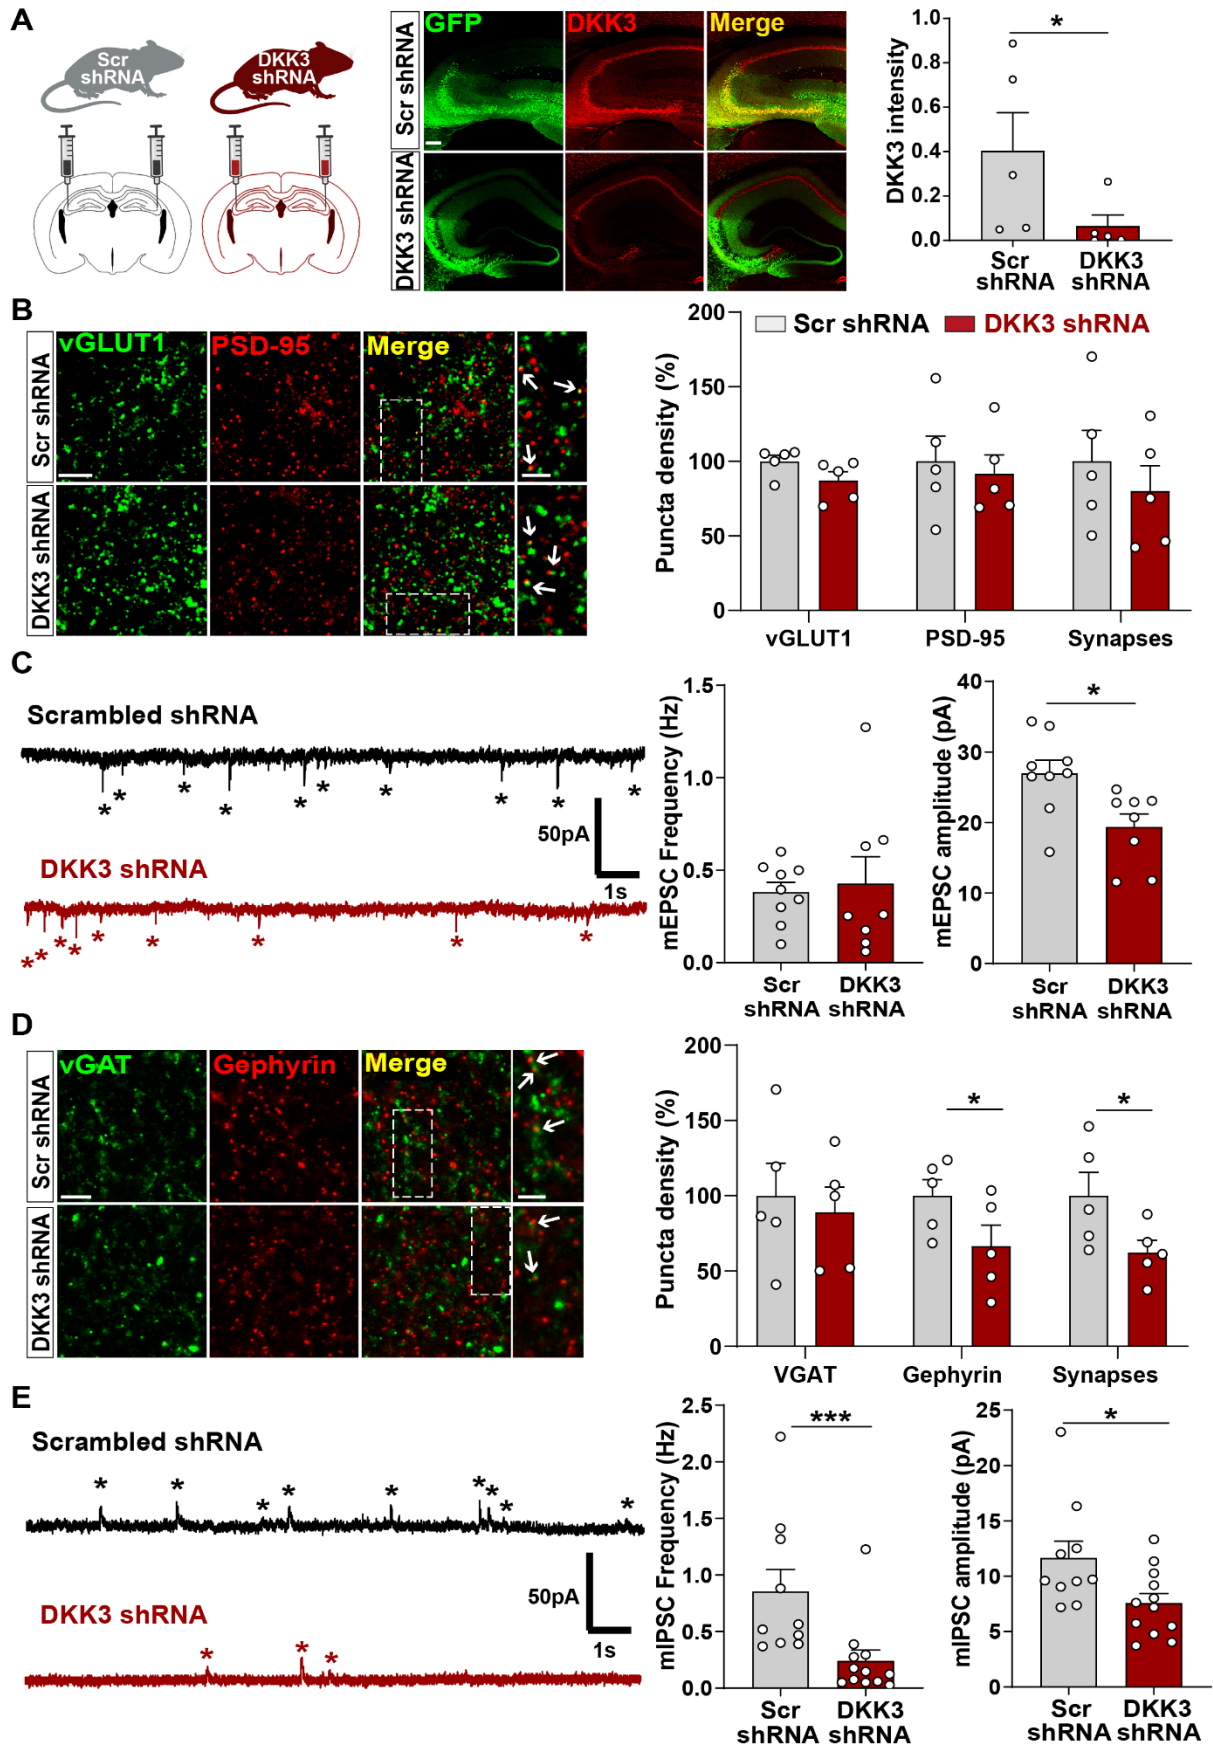

Figure 5

1176 **Figure 5. *In vivo* loss-of-function of DKK3 decreases inhibitory synapses but does not**  
1177 **affect excitatory synapses in the wild-type hippocampus.**

1178 (A) Diagram showing the experimental design. 3-month-old WT mice were injected with AAV9  
1179 scrambled (Scr) or DKK3 shRNA in the CA3 region. Confocal images showing GFP (green)  
1180 and DKK3 (red) in Scr- and DKK3-shRNA injected hippocampus. Scale bar = 145  $\mu$ m. Graph  
1181 shows quantification of DKK3 intensity in the area injected with the viruses.

1182 (B) Confocal images from CA3 SR show excitatory synapses (colocalized vGLUT1 puncta in  
1183 green and PSD-95 puncta in red). Arrows indicate excitatory synapses. Scale bar = 5  $\mu$ m and  
1184 2.5  $\mu$ m in zoomed-in images. Quantification is shown on the right-hand side (Student's T-test,  
1185 n = 5 animals per condition).

1186 (C) Representative mEPSC traces recorded at -60mV from CA3 cells. Stars indicate mEPSC  
1187 events. Quantification of mEPSC frequency and amplitude is shown on the right-hand side  
1188 (Student's T-test, n = 8-9 cells from 4 animals).

1189 (D) Confocal images from CA3 SR show inhibitory synapses (colocalized vGAT in green and  
1190 gephyrin in red). Arrows point to inhibitory synapses. Scale bar = 5  $\mu$ m and 2.5  $\mu$ m in zoomed-  
1191 in pictures. Quantification is shown on the right-hand side (Student's T-test, n = 5 animals).

1192 (E) Representative mIPSC traces recorded at 0mV from CA3 cells. Stars indicate mIPSC  
1193 events. Quantification of mIPSC frequency and amplitude is shown on the right-hand side  
1194 (Mann-Whitney test, n = 10-12 cells from 6 animals).



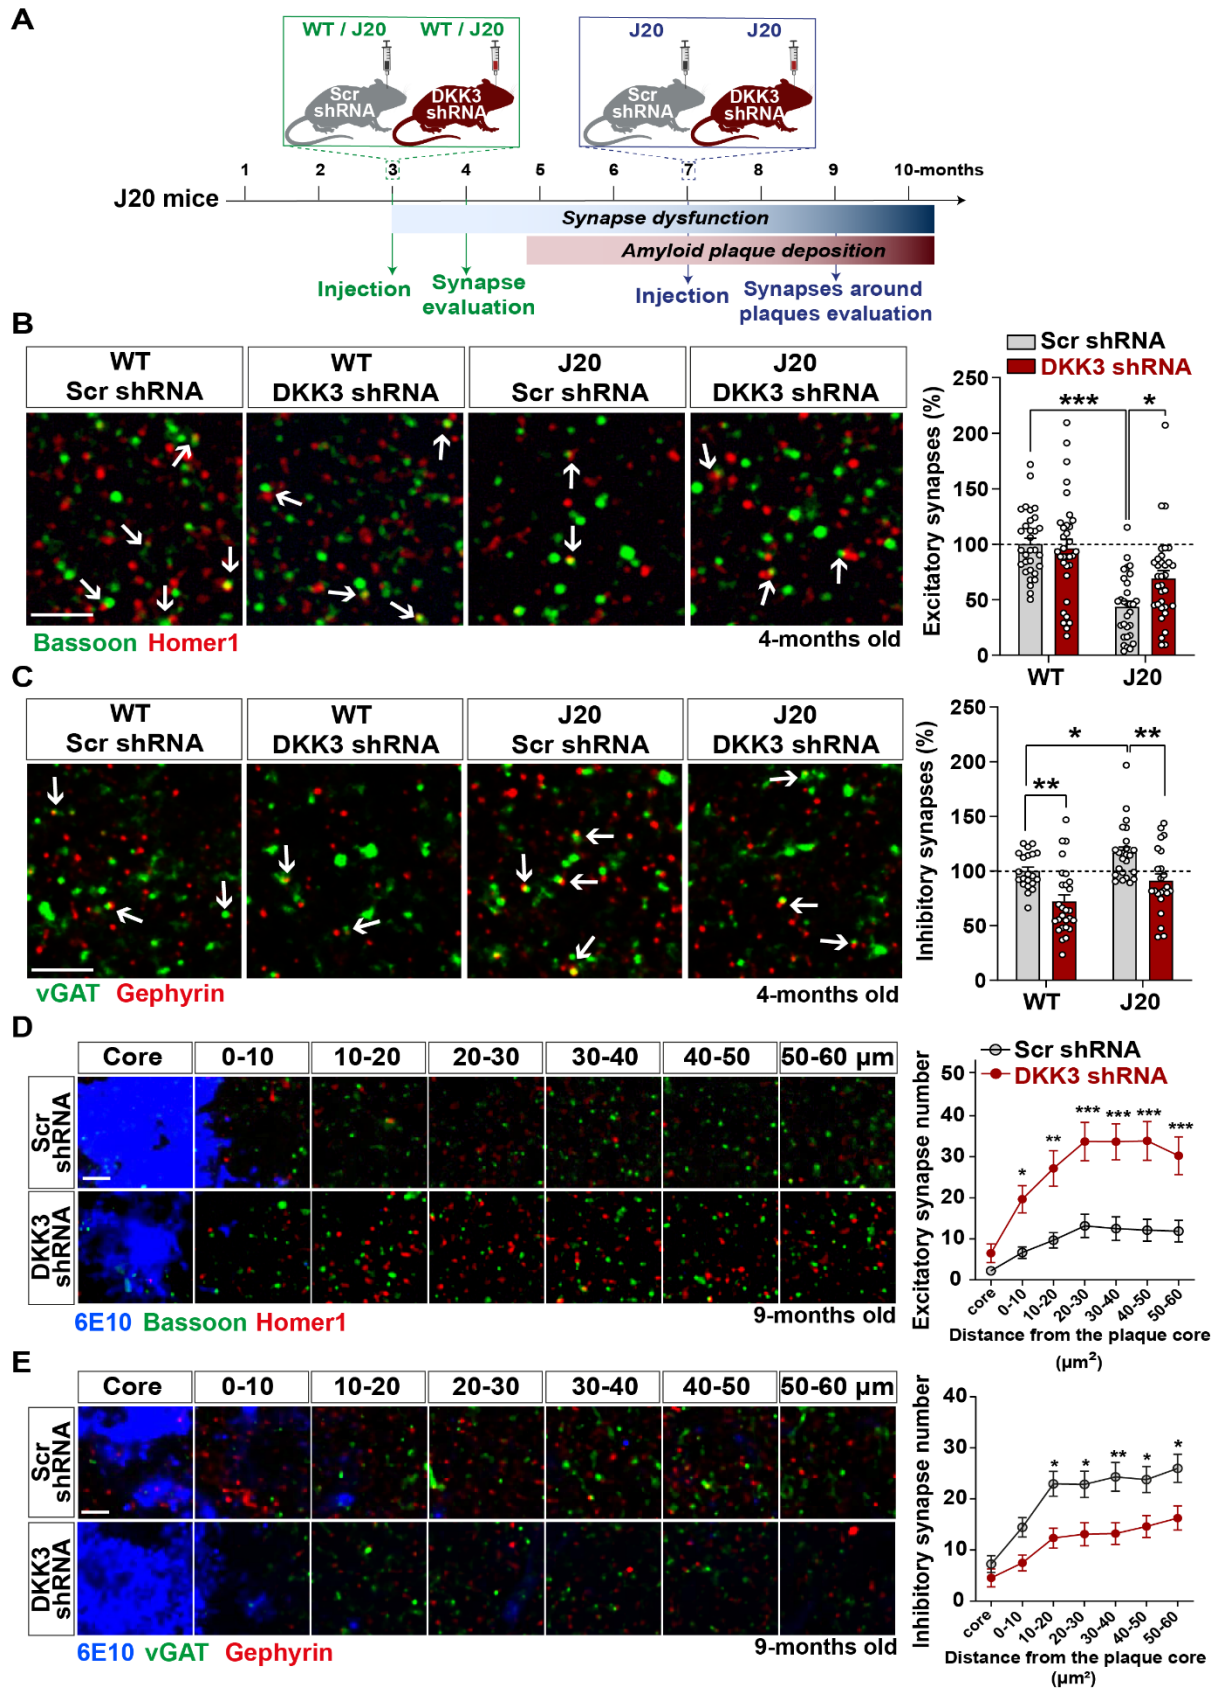

Figure 6

1195

1196

1197 **Figure 6. *In vivo* loss-of-function of DKK3 ameliorates synaptic changes in the**  
1198 **hippocampus of J20 mice before and after A $\beta$  plaque formation.**

1199 **(A)** Diagram depicting the experimental design. In green, 3-month-old WT and J20 mice were  
1200 injected bilaterally with AAV9-Scr shRNA or AAV9-DKK3 shRNA in the CA3 region. The  
1201 density of synapses was evaluated at 4-month-old before plaque deposition starts. In blue, 7-  
1202 month-old J20 mice were injected bilaterally with AAV9-Scr shRNA or AAV9-DKK3 shRNA in  
1203 the CA3 region. The density of synapses around plaques was evaluated at 9-month-old.

1204 **(B, C)** Representative confocal images from the CA3 SR region of 4-month-old WT and J20  
1205 mice. Images show **(B)** excitatory synapses (Bassoon in green and Homer1 in red) and **(C)**  
1206 inhibitory synapses (vGAT in green and Gephyrin in red). Arrows point to synapses. Scale bar  
1207 = 2.5  $\mu\text{m}$ . Quantification of synapse number as a percentage relative to WT-Scr shRNA  
1208 animals is shown on the right-hand side (Two-Way ANOVA followed by Tukey's post-hoc test,  
1209 n = 9-11 animals per condition and 2-3 brain slices per animal).

1210 **(D, E)** Representative confocal images from the CA3 SR region of 9-month-old J20 mice.  
1211 Images show an A $\beta$  plaque (6E10; blue) and **(D)** excitatory synapses or **(E)** inhibitory  
1212 synapses at different distances relative to the core of the plaque. Scale bar = 2.5  $\mu\text{m}$ . Graphs  
1213 show synapse number per 200  $\mu\text{m}^3$  at each distance (Two-Way ANOVA followed by Tukey's  
1214 post-hoc test, n = 6-7 animals per condition and 2-3 brain slices per animal).

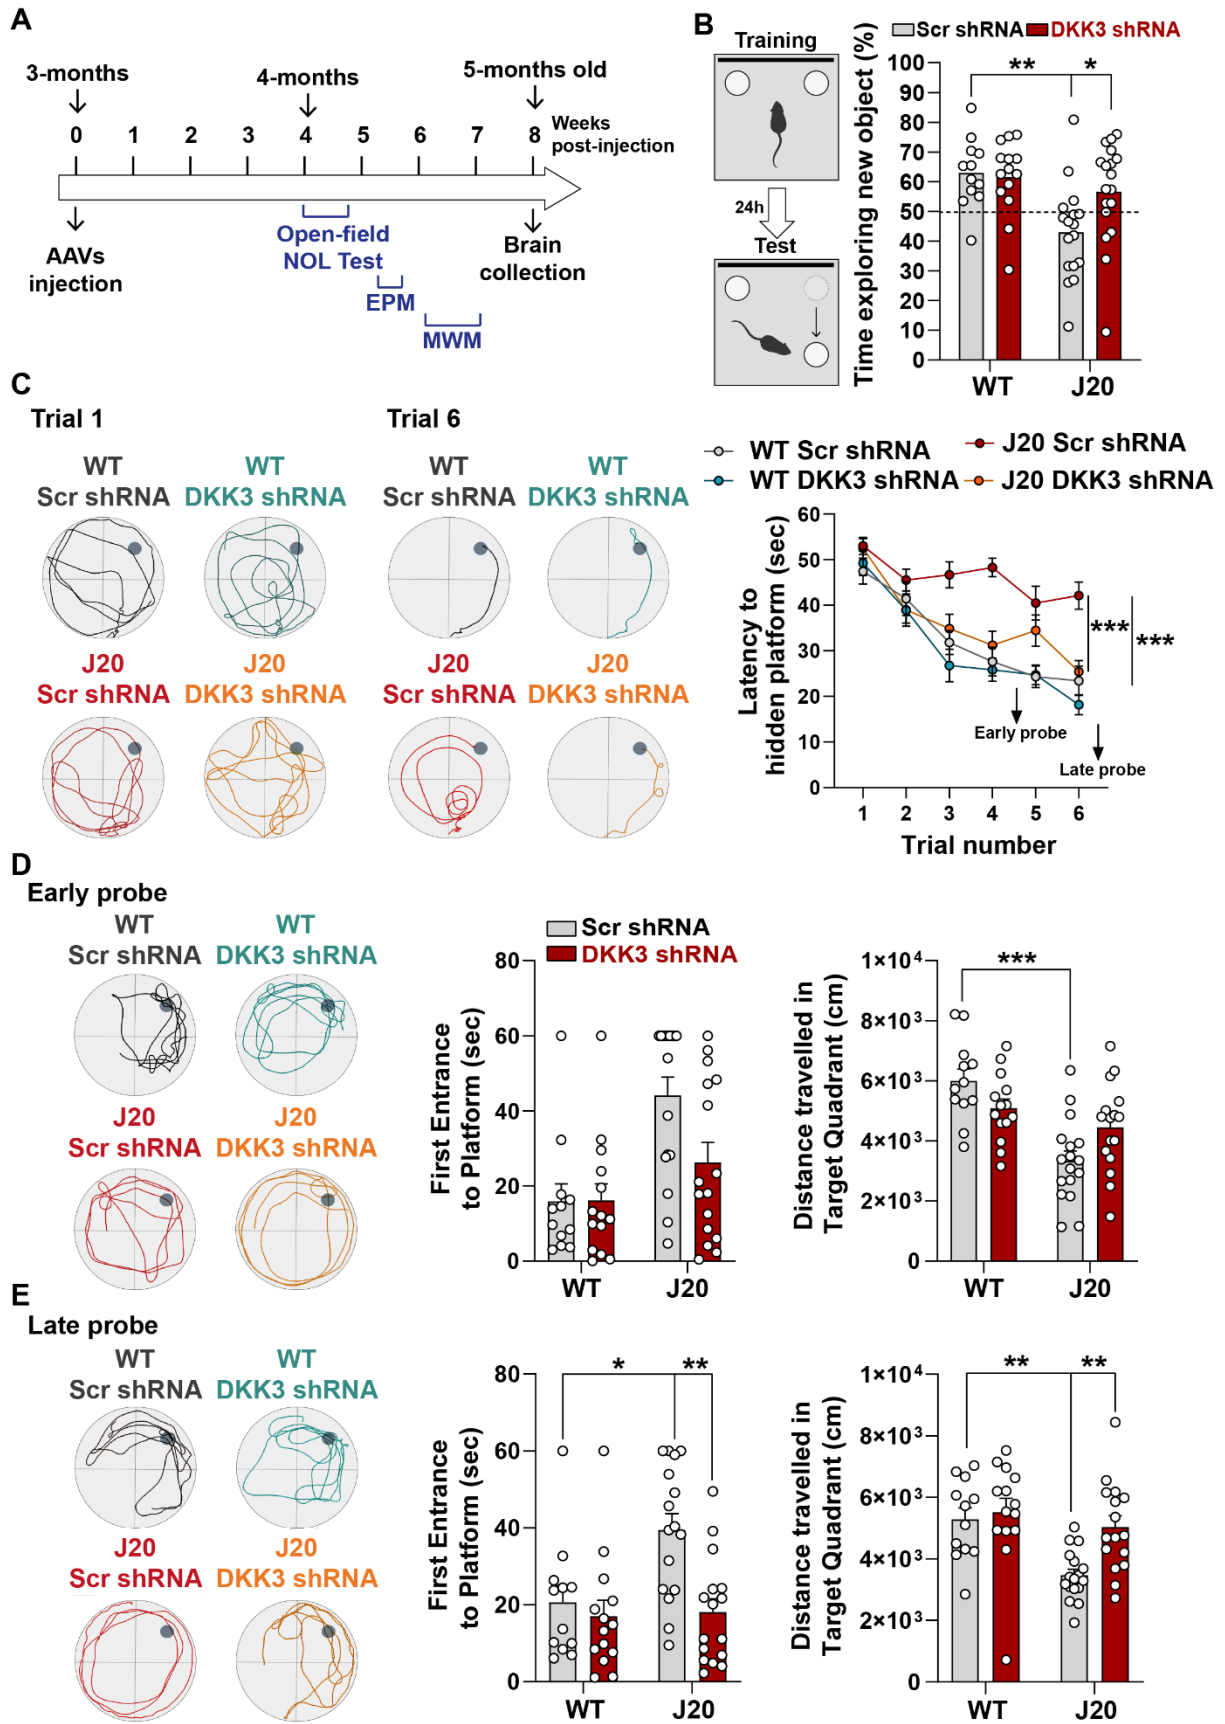

Figure 7

1215

1216

1217 **Figure 7. *In vivo* loss-of-function of DKK3 improves spatial memory in J20 mice.**

1218 (A) Diagram depicting that 3-month-old WT and J20 mice were injected bilaterally with AAV9-  
1219 Scr shRNA or AAV9-DKK3 shRNA in the CA3 area of the hippocampus. One month later, the  
1220 behavior of animals was assessed using the Open-field, Novel Object Location (NOL) test,  
1221 Elevated-Plus Maze (EPM), and the Morris water maze (MWM).

1222 (B) Novel Object Location Test. The percentage of time exploring the new object location  
1223 *versus* the total time was evaluated (Two-Way ANOVA with Tukey's post-hoc test, n = 12 WT  
1224 Scr shRNA, 14 WT DKK3 shRNA, 17 J20 Scr shRNA, 16 J20 DKK3 shRNA).

1225 (C- E) Morris Water Maze.

1226 (C) Representative traces for the MWM Trials 1 and 6 are shown. Graph on the right shows  
1227 the escape latency. Two-way ANOVA with repeated measures showed a significant effect  
1228 over trials (animal group  $F_{(3,55)} = 16.97$ ,  $p$ -value < 0.0001; trial  $F_{(5,259)} = 42.94$ ,  $p$ -value = 0.457;  
1229 animal group and trial interaction  $F_{(15,275)} = 2.753$ ,  $p$ -value = 0.0006). For all analyses (n=12  
1230 WT Scr shRNA, 14 WT DKK3 shRNA, 17 J20 Scr shRNA, 16 J20 DKK3 shRNA). Graph show  
1231 comparison between groups (Two-way ANOVA followed by Tukey's multiple comparisons).

1232 (D, E) Representative traces for the (D) Early and (E) Late probes. Graphs on the right show  
1233 the time (sec) to first reach the target location (Kruskal Wallis followed by Dunns' multiple  
1234 comparisons) and the distance (cm) traveled in the target quadrant (Two-way ANOVA followed  
1235 by Tukey's post-hoc test for the early trial or Kruskal Wallis followed by Dunns' multiple  
1236 comparisons).

1237
